# Supplementary material for: Alcohol Exposure and Disease Associations: A Mendelian Randomization and Meta-Analysis on Weekly Consumption and Problematic Drinking
Source: MDPI journal article supplement (doi:10.3390/nu16101517), 2024-05-17
Supplement: s1 [file s1]

**Additional files**

**Alcohol Exposure and Disease Associations: A Mendelian Randomization and Meta-Analysis on Weekly Consumption and Problematic Drinking**

**Authors and institutions**

**Mengyao Li<sup>1,2</sup>, Xuying Zhang<sup>1,2</sup>, Kailei Chen<sup>1,2</sup>, Yang Miao<sup>1,2</sup>, Yaxin Xu<sup>1,2</sup>, Yishuo Sun<sup>1,2</sup>, Mengxian Jiang<sup>1,2</sup>, Mengcao Liu<sup>1,2</sup>, Yan Gao<sup>1,2</sup>, Xiaoxia Xue<sup>2,3</sup>, Xuelian Li<sup>1,2\*</sup>**

**1, Key Laboratory of Environmental Stress and Chronic Disease Control & Prevention, China Medical University, Ministry of Education, Shenyang 110122, China.**

**2, Department of Epidemiology, School of Public Health, China Medical University, Shenyang 110122, China.**

**3, Science Experiment Center, China Medical University, No.77 Puhe Road, Shenyang North New Area, Shenyang 110122, China.**

**Corresponding author.**

**Xuelian Li**

**Department of Epidemiology, School of Public Health, China Medical University, Shenyang 110122, China.**

**Science Experiment Center, China Medical University, No.77 Puhe Road, Shenyang North New Area, Shenyang 110122, China.**

**E-mail address: [xlli@cmu.edu.cn](mailto:xlli@cmu.edu.cn)**

## Contents

|                                                                                                                                                                                                                                                                                                 |        |
|-------------------------------------------------------------------------------------------------------------------------------------------------------------------------------------------------------------------------------------------------------------------------------------------------|--------|
| Table S1. Literature Quality Scoring Criteria.....                                                                                                                                                                                                                                              | - 1 -  |
| Table S2. Characteristics of Included Studies. ....                                                                                                                                                                                                                                             | - 2 -  |
| Table S3. Single nucleotide polymorphism loci used as instrumental variables for alcohol consumption.....                                                                                                                                                                                       | - 7 -  |
| Table S4. Single nucleotide polymorphism loci used as instrumental variables for problematic alcohol use. ....                                                                                                                                                                                  | - 12 - |
| Table S5. Characterization of outcome disease data.....                                                                                                                                                                                                                                         | - 14 - |
| Table S6. Mendelian randomization studies included in the meta-analyses of genetic liability to alcohol consumption in relation to Circulatory system diseases, Digestive system diseases, Nervous system diseases and mental and behavioral disorders, Neoplasms, and Other diseases. ....     | - 20 - |
| Table S7. Mendelian randomization studies included in the meta-analyses of genetic liability to problematic alcohol use in relation to Circulatory system diseases, Digestive system diseases, Nervous system diseases and mental and behavioral disorders, Neoplasms, and Other diseases. .... | - 49 - |
| Table S8. MVMR analysis estimating the effect of alcohol consumption on disease, conditioning on smoking.....                                                                                                                                                                                   | - 60 - |
| Table S9. The effects model was corrected using the B/H correction. ....                                                                                                                                                                                                                        | - 62 - |
| Table S10. Search Strategies for PubMed, Embase, Web of Science, and Scopus Databases. ....                                                                                                                                                                                                     | - 64 - |
| Figure S1. Literature review and study design.....                                                                                                                                                                                                                                              | - 65 - |
| Figure S2. Genetic predictors of "alcohol consumption" and disease risk were summarized by IVW, WME, MR-Egger .....                                                                                                                                                                             | - 66 - |
| Figure S3. Genetic predictors of "problematic alcohol use" and disease risk were summarized by IVW, WME, MR-Egger .....                                                                                                                                                                         | - 67 - |

Table S1. Literature Quality Scoring Criteria

| Standard                         |                                                                                                                                                           | score |
|----------------------------------|-----------------------------------------------------------------------------------------------------------------------------------------------------------|-------|
| Relevance assumption             | Instrumental variable genome-wide association analysis was significant ( $p < 5 \times 10^{-8}$ ) and instrumental variable F-statistic $> 10$ .          | 3     |
|                                  | Instrumental variable genome-wide association analysis was significant ( $5 \times 10^{-8} < p < 0.05$ ) and instrumental variable F-statistic $> 10$ .   | 2     |
|                                  | Not assessed or does not meet the above conditions                                                                                                        | 1     |
| Independence assumption          | Genetic independence of instrumental variables, and linkage disequilibrium effects were assessed by including populations of the same genetic background. | 3     |
|                                  | Only the assumption is described and not fully assessed.                                                                                                  | 2     |
|                                  | Not described and not assessed                                                                                                                            | 1     |
| Exclusion-restriction assumption | Assessment of instrumental variables for pleiotropy, heterogeneity.                                                                                       | 3     |
|                                  | Only the assumption is described and not fully assessed.                                                                                                  | 2     |
|                                  | Not described and not assessed                                                                                                                            | 1     |
| Problem of sample overlap        | Mention the issue of overlapping samples of exposure and outcome use data and make relevant assessments.                                                  | 2     |
|                                  | Not mentioned, assessed.                                                                                                                                  | 1     |
| Statistical power                | Mention and perform calculations                                                                                                                          | 1     |
|                                  | Not mentioned, not calculated                                                                                                                             | 0     |

Total score of 12; quality rating: low (0-4), medium (5-8), high (9-12).

Table S2. Characteristics of Included Studies.

| Authors<br>(Year)              | PMID     | Exposure            | Source of<br>exposure | Ethnicity<br>of<br>exposure | Outcome                                                                                                                                                                                                | Source of<br>outcome                                       | Ethnicity<br>of<br>outcome | Quality<br>scores |
|--------------------------------|----------|---------------------|-----------------------|-----------------------------|--------------------------------------------------------------------------------------------------------------------------------------------------------------------------------------------------------|------------------------------------------------------------|----------------------------|-------------------|
| Zhang<br>(2022)                | 35334809 | Alcohol consumption | 30643251              | European                    | Epilepsy                                                                                                                                                                                               | 30531953                                                   | European                   | 9                 |
| Andrews<br>(2020)              | 31786126 | Alcohol consumption | 30643251              | European                    | Alzheimer's Disease                                                                                                                                                                                    | 28628103                                                   | European                   | 11                |
| Domínguez-<br>Baleón<br>(2021) | 34234189 | Alcohol consumption | 30643251              | European                    | Parkinson's Disease                                                                                                                                                                                    | 31701892                                                   | European                   | 9                 |
| Domenighetti<br>(2022)         | 34633332 | Alcohol consumption | 30643251              | European                    | Parkinson's Disease                                                                                                                                                                                    | JPND                                                       | European                   | 9                 |
| Zhou<br>(2022)                 | 35102554 | Alcohol consumption | 30643251              | European                    | Colorectal cancer                                                                                                                                                                                      | 32638365                                                   | European                   | 11                |
| Larsson<br>(2020)              | 32701947 | Alcohol consumption | 30643251              | European                    | Colorectal cancer;<br>Pancreatic cancer;<br>Ovarian cancer;<br>Endometrial cancer;<br>Cervical cancer;<br>Prostate cancer;<br>Lung cancer;<br>Kidney cancer;<br>Brain cancer;<br>Head and neck cancer; | 24880342<br>29059683<br>28346442<br>29892016<br>UK Biobank | European                   | 10                |

|                |          |                     |          |          |                                                                                                                                                                                                                                                                                                                                   |                                                   |          |    |
|----------------|----------|---------------------|----------|----------|-----------------------------------------------------------------------------------------------------------------------------------------------------------------------------------------------------------------------------------------------------------------------------------------------------------------------------------|---------------------------------------------------|----------|----|
|                |          |                     |          |          | Malignant melanoma;<br>Non-Hodgkin lymphoma;<br>Leukemia;<br>Multiple myeloma                                                                                                                                                                                                                                                     |                                                   |          |    |
| Yuan<br>(2023) | 36727839 | Alcohol consumption | 30643251 | European | Esophageal cancer;<br>Gastric cancer;<br>Cholecystitis;<br>Hepatocellular Carcinoma;<br>NAFLD;<br>Alcoholic Liver Disease;<br>Cirrhosis;<br>GERD;<br>Gastric Ulcer;<br>Duodenal Ulcer;<br>Gastric Ulcer;<br>Acute Pancreatitis;<br>Acute Appendicitis;<br>Diverticular Disease;<br>Crohn's Disease;<br>Ulcerative Colitis;<br>IBS | 26192919<br>33893285<br>UK Biobank<br>FinnGen(r7) | European | 11 |
| Yuan<br>(2022) | 33418132 | Alcohol consumption | 30643251 | European | Cholelithiasis                                                                                                                                                                                                                                                                                                                    | UK Biobank<br>FinnGen(r3)                         | European | 9  |
| Yuan<br>(2022) | 35488966 | Alcohol consumption | 30643251 | European | NAFLD                                                                                                                                                                                                                                                                                                                             | UK Biobank<br>FinnGen                             | European | 10 |

|                   |          |                         |          |          |                                                                     |                                  |          |    |
|-------------------|----------|-------------------------|----------|----------|---------------------------------------------------------------------|----------------------------------|----------|----|
| Yuan (2022)       | 35119566 | Alcohol consumption     | 30643251 | European | GERD                                                                | 31527586                         | European | 9  |
| Georgiou (2021)   | 32628751 | Alcohol consumption     | 30643251 | European | Crohn's Disease;<br>Ulcerative Colitis                              | 28067908                         | European | 12 |
| Yuan (2021)       | 34187701 | Alcohol consumption     | 30643251 | European | Spontaneous abortion                                                | UK Biobank                       | European | 8  |
| Rogne (2022)      | 35390318 | Alcohol consumption     | 30643251 | European | Ectopic pregnancy                                                   | UK Biobank<br>FinnGen            | European | 7  |
| Zhou (2022)       | 35708873 | Alcohol consumption     | 30643251 | European | Breast cancer                                                       | 32424353                         | European | 11 |
|                   |          | Problematic alcohol use | 32451486 | European |                                                                     |                                  |          |    |
| Wang (2022)       | 36309747 | Alcohol consumption     | 30643251 | European | Hyperplasia of prostate                                             | UK Biobank<br>FinnGen(r5)        | European | 9  |
| Baumeister (2021) | 34472130 | Alcohol consumption     | 30643251 | European | Chronic Periodontitis                                               | 31235808                         | European | 10 |
| Jiang (2021)      | 34239545 | Alcohol consumption     | 30643251 | European | Rheumatoid arthritis;<br>Lupus erythematosus;<br>Multiple Sclerosis | 24390342<br>26502338<br>31604244 | European | 9  |
| Yuan (2022)       | 35029599 | Alcohol consumption     | 30643251 | European | Migraine                                                            | 27322543                         | European | 9  |
| Zhu (2023)        | 36862322 | Alcohol consumption     | 30643251 | European | Sepsis;<br>Pneumonia;<br>URIT;<br>UTI                               | UK Biobank                       | European | 9  |
| Xiong (2022)      | 35904850 | Alcohol consumption     | 30643251 | European | Bladder cancer                                                      | UK Biobank<br>FinnGen(r5)        | European | 10 |

|                   |          |                     |          |          |                                                                                                             |                           |          |    |
|-------------------|----------|---------------------|----------|----------|-------------------------------------------------------------------------------------------------------------|---------------------------|----------|----|
| Yuan<br>(2022)    | 35013517 | Alcohol consumption | 30643251 | European | Senile cataract                                                                                             | UK Biobank<br>FinnGen(r4) | European | 8  |
| Kuan<br>(2021)    | 34734970 | Alcohol consumption | 30643251 | European | Age-related<br>degeneration      macular                                                                    | 26691988                  | European | 11 |
| Gormley<br>(2020) | 33247085 | Alcohol consumption | 30643251 | European | Oral and oropharyngeal<br>cancer                                                                            | 27749845                  | European | 11 |
| Oort<br>(2020)    | 32682105 | Alcohol consumption | 30643251 | European | Heart failure                                                                                               | 31919418                  | European | 12 |
| Larsson<br>(2020) | 32367730 | Alcohol consumption | 30643251 | European | Heart failure;<br>Peripheral vascular disease;<br>Stroke;<br>Atrial fibrillation;<br>Venous thromboembolism | UK Biobank                | European | 10 |
| Hoek<br>(2022)    | 35929454 | Alcohol consumption | 30643251 | European | Peripheral vascular disease                                                                                 | 31285632                  | European | 10 |
| Rosoff<br>(2020)  | 33275596 | Alcohol consumption | 30643251 | European | Coronary      artery<br>atherosclerosis;<br>Myocardial infarction;<br>Hypertension                          | UK Biobank<br>FinnGen     | European | 9  |
| Jiang<br>(2020)   | 32540331 | Alcohol consumption | 30643251 | European | Atrial fibrillation                                                                                         | 30061737                  | European | 10 |
| Zhou<br>(2022)    | 36003339 | Alcohol consumption | 30643251 | European | Aortic aneurysm                                                                                             | UK Biobank<br>FinnGen(r6) | European | 9  |
| Pasman<br>(2020)  | 32634714 | Alcohol consumption | 30643251 | European | Insomnia                                                                                                    | UK Biobank                | European | 10 |

|             |          |                     |          |          |                |                           |          |    |
|-------------|----------|---------------------|----------|----------|----------------|---------------------------|----------|----|
| Yuan (2021) | 34666504 | Alcohol consumption | 30643251 | European | Varicose veins | UK Biobank<br>FinnGen(r4) | European | 12 |
|-------------|----------|---------------------|----------|----------|----------------|---------------------------|----------|----|

PMID: PubMed database unique identifier; JPND: The EU Joint Programme–Neurodegenerative Disease Research; ADHD: Attention Deficit Hyperactivity Disorder syndrome; ALS: Amyotrophic lateral sclerosis; NAFLD: Nonalcoholic Fatty Liver Disease; GERD: Gastroesophageal reflux; IBS: irritable bowel syndrome; URIT: Acute upper respiratory tract infection; JPND: The EU joint programme–neurodegenerative disease; FinnGen: FinnGen database(<https://www.finngen.fi/en>); COVID-19 hg7: version 7 data published by the COVID-19 Host Genetics Program(<https://www.covid19hg.org/results/r7/>); UKB: The UK Biobank(<https://www.ukbiobank.ac.uk/>).



Table S3. Single nucleotide polymorphism loci used as instrumental variables for alcohol consumption.

| SNP        | EA | NEA | EAf       | Beta     | SE    | P        | F     |
|------------|----|-----|-----------|----------|-------|----------|-------|
| rs61873510 | T  | G   | 0.306163  | -0.0105  | 0.002 | 1.17E-08 | 27.56 |
| rs74813718 | G  | C   | 0.0417495 | -0.0189  | 0.003 | 1.97E-08 | 39.69 |
| rs3133388  | A  | G   | 0.308151  | -0.0157  | 0.002 | 2.85E-13 | 61.62 |
| rs17613838 | C  | T   | 0.150099  | 0.0144   | 0.002 | 1.19E-10 | 51.84 |
| rs1894071  | G  | A   | 0.845924  | 0.0168   | 0.002 | 7.60E-12 | 70.56 |
| rs1699104  | A  | C   | 0.55169   | 0.0116   | 0.002 | 4.04E-08 | 33.64 |
| rs11030084 | T  | C   | 0.190855  | -0.0151  | 0.002 | 2.27E-11 | 57.00 |
| rs7938022  | C  | T   | 0.714712  | 0.0121   | 0.002 | 4.25E-08 | 36.60 |
| rs79175663 | T  | C   | 0.161034  | 0.0146   | 0.002 | 1.03E-09 | 53.29 |
| rs2053980  | C  | A   | 0.333002  | -0.0192  | 0.002 | 1.95E-18 | 92.16 |
| rs10743083 | G  | A   | 0.815109  | -0.015   | 0.002 | 1.64E-10 | 56.25 |
| rs55863153 | C  | A   | 0.0178926 | 0.0316   | 0.005 | 2.48E-09 | 39.94 |
| rs61929956 | A  | G   | 0.228628  | -0.0118  | 0.002 | 1.98E-08 | 34.81 |
| rs4463912  | T  | C   | 0.378728  | -0.00992 | 0.002 | 2.77E-08 | 24.60 |
| rs4761961  | C  | A   | 0.558648  | -0.0108  | 0.002 | 5.19E-10 | 29.16 |
| rs3809162  | G  | A   | 0.384692  | 0.0102   | 0.002 | 6.84E-09 | 26.01 |
| rs56115085 | T  | C   | 0.145129  | -0.0132  | 0.002 | 4.14E-08 | 43.56 |
| rs11114780 | T  | C   | 0.222664  | 0.0132   | 0.002 | 1.60E-08 | 43.56 |
| rs1821711  | A  | G   | 0.651093  | -0.0101  | 0.002 | 2.13E-08 | 25.50 |
| rs6538292  | G  | A   | 0.616302  | -0.0107  | 0.002 | 2.12E-09 | 28.62 |
| rs9670378  | C  | A   | 0.591451  | -0.0107  | 0.002 | 2.32E-08 | 28.62 |
| rs1123285  | G  | C   | 0.348907  | -0.0109  | 0.002 | 2.59E-09 | 29.70 |
| rs55791516 | G  | T   | 0.751491  | -0.0156  | 0.002 | 1.46E-11 | 60.84 |

|             |   |   |           |         |       |          |        |
|-------------|---|---|-----------|---------|-------|----------|--------|
| rs28929474  | T | C | 0.0168986 | -0.0489 | 0.006 | 3.28E-14 | 66.42  |
| rs9745238   | G | C | 0.667992  | -0.0132 | 0.002 | 1.38E-09 | 43.56  |
| rs2414133   | G | A | 0.286282  | 0.0106  | 0.002 | 3.02E-08 | 28.09  |
| rs2472297   | T | C | 0.214712  | 0.0111  | 0.002 | 2.34E-08 | 30.80  |
| rs28616142  | T | C | 0.418489  | 0.0112  | 0.002 | 2.99E-10 | 31.36  |
| rs17177078  | T | C | 0.0725646 | -0.0263 | 0.004 | 4.96E-13 | 43.23  |
| rs2650496   | C | T | 0.340954  | -0.0173 | 0.002 | 3.04E-14 | 74.82  |
| rs3814877   | T | G | 0.382704  | -0.0111 | 0.002 | 5.64E-10 | 30.80  |
| rs1558902   | A | T | 0.432406  | -0.0117 | 0.002 | 6.42E-11 | 34.22  |
| rs62044501  | G | A | 0.186879  | -0.0125 | 0.002 | 3.48E-08 | 39.06  |
| rs11075711  | T | C | 0.16501   | -0.0134 | 0.002 | 1.31E-08 | 44.89  |
| rs62052824  | G | A | 0.203777  | 0.0141  | 0.003 | 4.16E-08 | 22.09  |
| rs113968734 | A | C | 0.134195  | 0.017   | 0.002 | 1.00E-11 | 72.25  |
| rs11860773  | C | T | 0.184891  | -0.0157 | 0.002 | 1.04E-12 | 61.62  |
| rs13332432  | G | C | 0.293241  | 0.0129  | 0.002 | 1.64E-11 | 41.60  |
| rs1971157   | C | G | 0.394632  | 0.00987 | 0.002 | 2.74E-08 | 24.35  |
| rs55938136  | G | A | 0.238569  | -0.023  | 0.002 | 1.22E-27 | 132.25 |
| rs147431626 | A | G | 0.249503  | -0.0294 | 0.002 | 7.52E-32 | 216.09 |
| rs11078696  | T | G | 0.710736  | 0.02    | 0.003 | 4.29E-12 | 44.44  |
| rs4130668   | C | T | 0.770378  | 0.0119  | 0.002 | 1.77E-08 | 35.40  |
| rs148390057 | T | C | 0.439364  | -0.0111 | 0.002 | 2.91E-08 | 30.80  |
| rs4890444   | G | C | 0.374751  | 0.0112  | 0.002 | 1.89E-09 | 31.36  |
| rs78308288  | T | C | 0.198807  | 0.0129  | 0.002 | 1.48E-08 | 41.60  |
| rs72926972  | A | C | 0.0675944 | -0.0173 | 0.003 | 4.96E-08 | 33.25  |
| rs1942964   | G | T | 0.49503   | -0.0107 | 0.002 | 3.89E-09 | 28.62  |
| rs838145    | A | G | 0.581511  | -0.0164 | 0.002 | 5.62E-21 | 67.24  |

|            |   |   |           |          |       |          |        |
|------------|---|---|-----------|----------|-------|----------|--------|
| rs12748460 | T | C | 0.188867  | -0.0144  | 0.002 | 1.36E-09 | 51.84  |
| rs10753661 | A | G | 0.738569  | -0.0113  | 0.002 | 1.25E-09 | 31.92  |
| rs6691053  | T | C | 0.218688  | -0.0138  | 0.002 | 1.24E-10 | 47.61  |
| rs823099   | A | C | 0.414513  | 0.0105   | 0.002 | 2.31E-09 | 27.56  |
| rs12044012 | A | G | 0.360835  | -0.0116  | 0.002 | 1.34E-09 | 33.64  |
| rs6698883  | T | C | 0.899602  | -0.0161  | 0.003 | 1.14E-08 | 28.80  |
| rs12121630 | A | G | 0.149105  | -0.0136  | 0.002 | 1.59E-08 | 46.24  |
| rs2310752  | A | G | 0.428429  | -0.00977 | 0.002 | 2.57E-08 | 23.86  |
| rs6136465  | A | G | 0.407555  | -0.00982 | 0.002 | 3.01E-08 | 24.11  |
| rs35006396 | G | A | 0.228628  | 0.0128   | 0.002 | 2.82E-08 | 40.96  |
| rs4502500  | G | C | 0.370775  | -0.00995 | 0.002 | 2.07E-08 | 24.75  |
| rs7284839  | T | C | 0.798211  | 0.0155   | 0.003 | 3.66E-08 | 26.69  |
| rs17884691 | A | G | 0.232604  | -0.0114  | 0.002 | 2.91E-08 | 32.49  |
| rs76217384 | G | A | 0.208748  | 0.0136   | 0.002 | 3.37E-11 | 46.24  |
| rs6715038  | T | C | 0.738569  | 0.0124   | 0.002 | 9.53E-09 | 38.44  |
| rs1001129  | A | G | 0.812127  | -0.0122  | 0.002 | 4.18E-08 | 37.21  |
| rs1973044  | T | C | 0.817097  | 0.0133   | 0.002 | 1.31E-08 | 44.22  |
| rs11125160 | A | G | 0.661034  | 0.0102   | 0.002 | 3.96E-08 | 26.01  |
| rs1260326  | C | T | 0.589463  | 0.0254   | 0.002 | 3.16E-46 | 161.29 |
| rs441413   | G | T | 0.0785288 | -0.0211  | 0.003 | 1.26E-09 | 49.47  |
| rs62136829 | T | C | 0.0377734 | -0.0295  | 0.004 | 3.74E-11 | 54.39  |
| rs570305   | G | C | 0.578529  | 0.0175   | 0.002 | 3.19E-20 | 76.56  |
| rs1949613  | T | G | 0.709742  | 0.013    | 0.002 | 8.14E-11 | 42.25  |
| rs7566031  | T | C | 0.302187  | 0.0139   | 0.002 | 3.61E-13 | 48.30  |
| rs828867   | A | G | 0.522863  | 0.0103   | 0.002 | 3.44E-09 | 26.52  |
| rs11692435 | A | G | 0.083499  | 0.0191   | 0.003 | 7.20E-11 | 40.53  |

|             |   |   |           |          |       |           |         |
|-------------|---|---|-----------|----------|-------|-----------|---------|
| rs147711594 | T | G | 0.0248509 | -0.0298  | 0.005 | 2.91E-08  | 35.52   |
| rs66652990  | A | T | 0.243539  | -0.014   | 0.002 | 6.19E-09  | 49.00   |
| rs6787172   | G | T | 0.537773  | -0.0107  | 0.002 | 7.49E-10  | 28.62   |
| rs7618629   | G | A | 0.767396  | 0.0122   | 0.002 | 8.02E-10  | 37.21   |
| rs60026303  | G | A | 0.178926  | 0.0121   | 0.002 | 3.58E-08  | 36.60   |
| rs10154865  | T | C | 0.225646  | 0.0206   | 0.002 | 2.14E-23  | 106.09  |
| rs13135092  | G | A | 0.0854871 | -0.0357  | 0.003 | 4.00E-26  | 141.61  |
| rs57590313  | A | C | 0.175944  | -0.0129  | 0.002 | 4.60E-08  | 41.60   |
| rs7682731   | G | A | 0.827038  | 0.015    | 0.002 | 1.25E-09  | 56.25   |
| rs9685410   | A | T | 0.814115  | -0.0132  | 0.002 | 4.00E-09  | 43.56   |
| rs111203819 | G | T | 0.485089  | 0.0101   | 0.002 | 2.41E-08  | 25.50   |
| rs12646808  | C | T | 0.348907  | -0.011   | 0.002 | 2.47E-09  | 30.25   |
| rs11940694  | G | A | 0.611332  | 0.0279   | 0.002 | 9.51E-56  | 194.60  |
| rs58352691  | T | G | 0.0675944 | 0.0233   | 0.003 | 2.40E-11  | 60.32   |
| rs1229984   | C | T | 0.971173  | 0.193    | 0.005 | 1.17E-283 | 1489.96 |
| rs1693439   | G | A | 0.950298  | 0.0193   | 0.003 | 2.83E-08  | 41.39   |
| rs1789889   | A | G | 0.146123  | 0.0266   | 0.002 | 1.30E-32  | 176.89  |
| rs284784    | A | C | 0.218688  | -0.0119  | 0.002 | 1.13E-08  | 35.40   |
| rs10491278  | C | A | 0.145129  | -0.0135  | 0.002 | 2.96E-08  | 45.56   |
| rs6886898   | G | T | 0.562624  | -0.00951 | 0.002 | 4.51E-08  | 22.61   |
| rs55872084  | T | G | 0.22664   | 0.012    | 0.002 | 4.68E-09  | 36.00   |
| rs6899302   | C | T | 0.514911  | -0.0104  | 0.002 | 1.70E-09  | 27.04   |
| rs6861333   | G | C | 0.357853  | -0.011   | 0.002 | 2.10E-09  | 30.25   |
| rs357510    | A | G | 0.586481  | -0.0123  | 0.002 | 2.23E-09  | 37.82   |
| rs28361092  | A | G | 0.38171   | -0.0133  | 0.002 | 3.42E-09  | 44.22   |
| rs1906252   | A | C | 0.50497   | 0.00972  | 0.002 | 2.05E-08  | 23.62   |

|            |   |   |           |         |       |          |       |
|------------|---|---|-----------|---------|-------|----------|-------|
| rs756747   | G | T | 0.548708  | 0.0123  | 0.002 | 4.56E-11 | 37.82 |
| rs322773   | G | A | 0.552684  | 0.00986 | 0.002 | 1.48E-08 | 24.30 |
| rs6962879  | G | C | 0.632207  | 0.00993 | 0.002 | 1.89E-08 | 24.65 |
| rs2533133  | A | G | 0.471173  | 0.0148  | 0.002 | 1.02E-12 | 54.76 |
| rs11238438 | C | G | 0.424453  | 0.00958 | 0.002 | 3.73E-08 | 22.94 |
| rs12698893 | A | G | 0.180915  | -0.0153 | 0.002 | 1.04E-11 | 58.52 |
| rs34121855 | G | T | 0.191849  | 0.0135  | 0.002 | 9.92E-09 | 45.56 |
| rs641815   | G | A | 0.0616302 | -0.0194 | 0.003 | 2.30E-08 | 41.82 |
| rs800578   | C | T | 0.800199  | 0.0114  | 0.002 | 4.51E-08 | 32.49 |
| rs28601761 | G | C | 0.409543  | 0.0112  | 0.002 | 1.57E-10 | 31.36 |
| rs10105127 | C | T | 0.666004  | 0.0103  | 0.002 | 1.72E-08 | 26.52 |
| rs1484559  | C | T | 0.782306  | 0.012   | 0.002 | 1.66E-08 | 36.00 |
| rs55932213 | G | A | 0.701789  | 0.0127  | 0.002 | 1.61E-10 | 40.32 |
| rs4743005  | A | G | 0.191849  | -0.014  | 0.002 | 5.57E-10 | 49.00 |
| rs41297207 | T | C | 0.0914513 | -0.0171 | 0.003 | 1.16E-08 | 32.49 |

SNP: single nucleotide polymorphism; EA: effect allele; NEA: baseline allele; EAF: effect allele frequency; SE: standard error; P : P-value in GWAS summary dataset, all statistical tests were two-sided,  $P < 5 \times 10^{-8}$  was considered genome-wide significant; F: F-statistic, the intensity of the genetic tool is assessed using the F-statistic, with a value exceeding 10 indicating satisfactory tool strength.

The genetic risk of the “alcohol consumption (drink per week)” is defined at the time of the interview or questionnaires, measured by two questions[1]:

- In the past week, how many alcoholic beverages did you have?
- Thinking about the past year, on the average how many drinks did you have each week?

This phenotype captures alcohol use that is in the normal, or anyway nonpathological, range, that is important for understanding the biology of habitual alcohol use[2].

Table S4. Single nucleotide polymorphism loci used as instrumental variables for problematic alcohol use.

| SNP        | EA | NEA | EAF   | Beta      | SE       | P        | F      |
|------------|----|-----|-------|-----------|----------|----------|--------|
| rs6421482  | A  | G   | 0.436 | -0.016437 | 0.002603 | 2.71E-10 | 39.87  |
| rs61767420 | A  | G   | 0.4   | 0.015317  | 0.002681 | 1.11E-08 | 32.64  |
| rs1260326  | T  | C   | 0.403 | -0.024563 | 0.002642 | 1.44E-20 | 86.44  |
| rs494904   | T  | C   | 0.596 | -0.021371 | 0.002696 | 2.25E-15 | 62.84  |
| rs1402398  | A  | G   | 0.627 | 0.019088  | 0.002689 | 1.26E-12 | 50.39  |
| rs9679319  | T  | G   | 0.48  | -0.015647 | 0.002604 | 1.87E-09 | 36.11  |
| rs13382553 | A  | G   | 0.766 | -0.018415 | 0.003069 | 1.97E-09 | 36.00  |
| rs2673136  | A  | G   | 0.639 | -0.015802 | 0.002691 | 4.30E-09 | 34.48  |
| rs62250713 | A  | G   | 0.368 | 0.016267  | 0.002689 | 1.45E-09 | 36.60  |
| rs13129401 | A  | G   | 0.453 | -0.023316 | 0.002618 | 5.29E-19 | 79.32  |
| rs2602856  | A  | C   | 0.661 | -0.015678 | 0.002732 | 9.54E-09 | 32.93  |
| rs13125415 | A  | G   | 0.585 | -0.024219 | 0.002669 | 1.15E-19 | 82.34  |
| rs13135092 | A  | G   | 0.919 | 0.056302  | 0.004823 | 1.74E-31 | 136.27 |
| rs2533200  | C  | G   | 0.516 | -0.015305 | 0.002718 | 1.79E-08 | 31.71  |
| rs2582405  | T  | C   | 0.237 | 0.017499  | 0.003043 | 8.89E-09 | 33.07  |
| rs7900002  | T  | G   | 0.601 | -0.014549 | 0.002644 | 3.74E-08 | 30.28  |
| rs56722963 | T  | C   | 0.255 | -0.019028 | 0.002985 | 1.84E-10 | 40.63  |
| rs576859   | A  | C   | 0.327 | 0.020327  | 0.003585 | 1.43E-08 | 32.15  |
| rs6589386  | T  | C   | 0.432 | -0.019549 | 0.002603 | 5.90E-14 | 56.40  |
| rs10790456 | A  | G   | 0.78  | 0.023175  | 0.004123 | 1.90E-08 | 31.59  |
| rs12296477 | C  | G   | 0.547 | 0.014307  | 0.002609 | 4.16E-08 | 30.07  |
| rs61974485 | T  | C   | 0.265 | 0.016631  | 0.00302  | 3.65E-08 | 30.33  |
| rs8008020  | T  | C   | 0.418 | 0.015959  | 0.002633 | 1.35E-09 | 36.74  |

|            |   |   |       |           |          |          |       |
|------------|---|---|-------|-----------|----------|----------|-------|
| rs72768626 | A | G | 0.945 | 0.03219   | 0.005757 | 2.25E-08 | 31.26 |
| rs9937709  | A | G | 0.585 | 0.017382  | 0.002633 | 4.07E-11 | 43.58 |
| rs492602   | A | G | 0.508 | -0.015998 | 0.002604 | 8.07E-10 | 37.74 |

SNP: single nucleotide polymorphism; EA: effect allele; NEA: baseline allele; EAF: effect allele frequency; SE: standard error; P : P-value in GWAS summary dataset, all statistical tests were two-sided.  $P < 5 \times 10^{-8}$  was considered genome-wide significant; F: F-statistic, the intensity of the genetic tool is assessed using the F-statistic, with a value exceeding 10 indicating satisfactory tool strength.

The genetic risk of the “problematic alcohol use” is defined at the combination of three parts[2]:

- a. Alcohol use disorder (AUD) diagnosed through ICD-10/9;
  - b. lifetime DSM-IV diagnosis of alcohol dependence (AD);
  - c. AUDIT-P scores was assessed by 7 questions: 1). Frequency of inability to cease drinking; 2). Frequency of failure to fulfil normal expectations due to drinking alcohol; 3). Frequency of needing a morning drink of alcohol after a heavy drinking session; 4). Frequency of feeling guilt or remorse after drinking alcohol; 5). Frequency of memory loss due to drinking alcohol; 6). Been injured or injured someone else through drinking alcohol; 7). Had a relative, friend, or health worker who was concerned about or suggested a reduction in alcohol consumption.
- “Problematic alcohol use” captures pathological alcohol use: physiological dependence and/or significant psychological, social or medical consequences.

Table S5. Characterization of outcome disease data.

| Diseases                               | Data sources          | Cases | Controls | ICD-10                                                   |
|----------------------------------------|-----------------------|-------|----------|----------------------------------------------------------|
| <b>Mental and behavioral disorders</b> |                       |       |          |                                                          |
| Depression                             | FinnGen               | 43280 | 329192   | F32, F33                                                 |
| ADHD                                   | FinnGen               | 462   | 371117   | F90                                                      |
| Insomnia                               | FinnGen               | 4214  | 3514     | F51.0, G47.0                                             |
| <b>Diseases of the nervous system</b>  |                       |       |          |                                                          |
| Epilepsy                               | FinnGen               | 11740 | 287837   | G40                                                      |
| Alzheimer's Disease                    | FinnGen               | 6489  | 170429   | F00.1*, F00.10*,<br>F00.10*G30.1,<br>G30.1, G30.1+F00.10 |
| Parkinson's Disease                    | FinnGen               | 4235  | 373042   | G20                                                      |
| Multiple Sclerosis                     | FinnGen               | 2182  | 373987   | G35                                                      |
| ALS                                    | GWAS<br>Meta-analysis | 22040 | 62644    | G12.201                                                  |
| Migraine                               | FinnGen               | 18477 | 15905    | G43                                                      |
| Normal-pressure hydrocephalus          | FinnGen               | 767   | 375610   | G91.2                                                    |
| <b>Digestive system diseases</b>       |                       |       |          |                                                          |
| Cholangitis                            | FinnGen               | 1715  | 330903   | K83.0                                                    |
| Cholelithiasis                         | FinnGen               | 37041 | 330903   | K80                                                      |
| Cholecystitis                          | FinnGen               | 4299  | 330903   | K81                                                      |
| NAFLD                                  | FinnGen               | 2275  | 375002   | K76.0                                                    |
| Alcoholic Liver Disease                | FinnGen               | 2761  | 366450   | K70                                                      |



|                                    |         |       |        |                                               |
|------------------------------------|---------|-------|--------|-----------------------------------------------|
| Cirrhosis                          | FinnGen | 3970  | 373307 | K70,K74.0,<br>K74.1,K74.2,<br>K74.6,K74.6,I85 |
| GERD                               | FinnGen | 26184 | 320387 | K21                                           |
| Gastric Ulcer                      | FinnGen | 5935  | 320387 | K25                                           |
| Duodenal Ulcer                     | FinnGen | 3520  | 320387 | K26                                           |
| Acute Gastritis                    | FinnGen | 2370  | 320387 | K29.0, K29.1                                  |
| Chronic Gastritis                  | FinnGen | 9570  | 320387 | K29.3, K29.4,<br>K29.5                        |
| Acute Pancreatitis                 | FinnGen | 6223  | 330903 | K85                                           |
| Chronic Pancreatitis               | FinnGen | 3320  | 330903 | K86.00, K86.01,<br>K86.08, K86.1              |
| Acute Appendicitis                 | FinnGen | 28745 | 346283 | K35                                           |
| Diverticular Disease               | FinnGen | 30649 | 301931 | K57                                           |
| Crohn's Disease                    | FinnGen | 1665  | 375445 | K50                                           |
| Ulcerative Colitis                 | FinnGen | 5034  | 371530 | K51                                           |
| Noninfective enteritis and colitis | FinnGen | 7988  | 359927 | K52                                           |
| IBS                                | FinnGen | 9323  | 301931 | K58                                           |
| Chronic Periodontitis              | FinnGen | 4434  | 259234 | K05.30, K05.31                                |
| <b>Circulatory system disease</b>  |         |       |        |                                               |
| Heart failure                      | FinnGen | 27304 | 349973 | I11.0, I13.0,<br>I13.2, I50                   |
| Peripheral vascular disease        | FinnGen | 2230  | 349539 | I73                                           |
| Coronary artery atherosclerosis    | FinnGen | 47550 | 313400 | I24, I25,<br>T82.2, Z95.1                     |
| Stroke                             | FinnGen | 25398 | 339920 | I61, I63, I64                                 |

|                          |         |        |        |                                                                 |
|--------------------------|---------|--------|--------|-----------------------------------------------------------------|
| Myocardial infarction    | FinnGen | 24185  | 313400 | I21, I22                                                        |
| Atrial fibrillation      | FinnGen | 45766  | 191924 | I48                                                             |
| Hypertension             | FinnGen | 111581 | 265626 | I10-I15, I67.4                                                  |
| Venous thromboembolism   | FinnGen | 19372  | 357905 | I26, I80,<br>O87.1, O88.2                                       |
| Aortic aneurysm          | FinnGen | 7395   | 349539 | I71.1, I71.2,<br>I71.3, I71.4,<br>I71.5, I71.6,<br>I71.8, I71.9 |
| Varicose veins           | FinnGen | 29539  | 324121 | I83                                                             |
| <b>Neoplasms</b>         |         |        |        |                                                                 |
| Colorectal cancer        | FinnGen | 6509   | 287137 | C18, C19&, C20                                                  |
| Esophageal cancer        | FinnGen | 566    | 287137 | C15                                                             |
| Gastric cancer           | FinnGen | 1307   | 287137 | C16                                                             |
| Hepatocellular carcinoma | FinnGen | 453    | 287137 | C22.0&                                                          |
| Pancreatic cancer        | FinnGen | 1416   | 287137 | C25                                                             |
| Breast cancer            | FinnGen | 15680  | 167189 | C50                                                             |
| Ovarian cancer           | FinnGen | 1025   | 167189 | C56                                                             |
| Endometrial cancer       | FinnGen | 1967   | 1677   | C54                                                             |
| Cervical cancer          | FinnGen | 369    | 167189 | C53                                                             |
| Prostate cancer          | FinnGen | 13216  | 119948 | C61                                                             |
| Bladder cancer           | FinnGen | 2053   | 287137 | C67                                                             |
| Kidney cancer            | FinnGen | 2223   | 287137 | C64                                                             |
| Brain cancer             | FinnGen | 764    | 287137 | C71                                                             |

|                         |         |       |        |                                                                                |
|-------------------------|---------|-------|--------|--------------------------------------------------------------------------------|
| Head and Neck cancer    | FinnGen | 2131  | 287137 | C00&,C01&, C02, C03, C04, C05, C06, C07, C08,C09, C10,C11, C12&, C13, C14,C32  |
| Malignant melanoma      | FinnGen | 3960  | 286874 | C51.03&, C51.13&, C51.23&, C51.82&, C52.93&, C69.02&, C69.82&, C69.92&, D03.9& |
| Non-Hodgkin lymphoma    | FinnGen | 928   | 287137 | C82, C83, C84, C85                                                             |
| Multiple myeloma        | FinnGen | 585   | 287129 | C90.0                                                                          |
| <b>Other diseases</b>   |         |       |        |                                                                                |
| Spontaneous abortion    | FinnGen | 16906 | 149622 | O03                                                                            |
| Ectopic pregnancy       | FinnGen | 5648  | 149622 | O00                                                                            |
| Puerperal sepsis        | FinnGen | 3940  | 202267 | O85                                                                            |
| Hyperplasia of prostate | FinnGen | 30066 | 119297 | N40                                                                            |
| Rheumatoid arthritis    | FinnGen | 9243  | 368029 | M05                                                                            |
| Low back pain           | FinnGen | 2439  | 460571 | M54.5                                                                          |
| Osteoporosis            | FinnGen | 7300  | 358014 | M80, M81, M82*                                                                 |
| Lupus erythematosus     | FinnGen | 652   | 353088 | L93#                                                                           |
| Psoriasis               | FinnGen | 9267  | 364071 | L40                                                                            |

|                                                   |         |       |         |                                                                                                                                                                                                                            |
|---------------------------------------------------|---------|-------|---------|----------------------------------------------------------------------------------------------------------------------------------------------------------------------------------------------------------------------------|
| Asthma                                            | FinnGen | 42163 | 202399  | J45, J46                                                                                                                                                                                                                   |
| Pneumonia                                         | FinnGen | 58174 | 319103  | J12,J171,<br>J100,J110,<br>B012,B068,<br>B250,J13,<br>J14,J15,<br>J17.0*, J17.0*A01.0,<br>J17.0*A02.2,<br>J17.0*A21.2,<br>J17.0*A22.1,<br>J17.0*A37.9,<br>J17.0*A42.0,<br>J17.0*A43.0,<br>J17.0*A54.8,<br>J16,J17[2-8],J18 |
| COVID-19 (severe)                                 | HGI 7   | 18152 | 1145549 | U071                                                                                                                                                                                                                       |
| URIT                                              | FinnGen | 69111 | 308166  | J00-J06                                                                                                                                                                                                                    |
| Chronic rhinitis, nasopharyngitis and pharyngitis | FinnGen | 10868 | 283342  | J31                                                                                                                                                                                                                        |
| Senile cataract                                   | FinnGen | 59522 | 312864  | H25                                                                                                                                                                                                                        |
| Glaucoma                                          | FinnGen | 18902 | 358375  | H40-H42                                                                                                                                                                                                                    |
| Age-related macular degeneration                  | FinnGen | 8913  | 348936  | H35.31, H35.32,<br>H35.33                                                                                                                                                                                                  |
| Diabetic retinopathy                              | FinnGen | 10413 | 308633  | E11.3+,<br>E11.3+H28.0,<br>E11.3+H36.09                                                                                                                                                                                    |

ADHD: Attention Deficit Hyperactivity Disorder syndrome; ALS: Amyotrophic lateral sclerosis; NAFLD: Nonalcoholic Fatty Liver Disease; GERD: Gastroesophageal reflux; IBS: irritable bowel syndrome; URIT: Acute upper respiratory tract infection; FinnGen: FinnGen database(<https://www.finnngen.fi/en>); HGI 7: version 7 data published by the COVID-19 Host Genetics Program (<https://www.covid19hg.org/results/r7/>); ICD-10: International Classification of Diseases, Tenth Revision.

Table S6. Mendelian randomization studies included in the meta-analyses of genetic liability to alcohol consumption in relation to Circulatory system diseases, Digestive system diseases, Nervous system diseases and mental and behavioral disorders, Neoplasms, and Other diseases.

| Diseases                    | Data sources  | Cases | Controls | NI Vs | MR-PRESSO |          | IVW   |                    | Weight Median |                      |       | MR-Egger           |       |             | Author, years       |
|-----------------------------|---------------|-------|----------|-------|-----------|----------|-------|--------------------|---------------|----------------------|-------|--------------------|-------|-------------|---------------------|
|                             |               |       |          |       | P-gt      | Outliers | P-Q   | OR(95%CI)          | P             | OR(95%CI)            | P     | OR(95%CI)          | P     | P intercept |                     |
| Circulatory system disease  |               |       |          |       |           |          |       |                    |               |                      |       |                    |       |             |                     |
| Heart failure               | HFMETTC       | 47309 | 930014   | 91    | NA        | NA       | NA    | 1.11 ( 0.85,1.46 ) | 0.302         | 1.28 ( 0.89 , 1.86 ) | 0.081 | 1.30 ( 0.76,2.23 ) | 0.211 | NA          | Oort et al; 2020    |
|                             | UKB           | 6712  | 360874   | NA    | NA        | NA       | NA    | 1.00 ( 0.68,1.47 ) | 0.996         | NA                   | NA    | NA                 | NA    | NA          | Larsson et al; 2020 |
|                             | FinnGen       | 27304 | 349973   | 96    | 0.006     | NA       | 0.005 | 1.06 ( 0.87,1.29 ) | 0.564         | 1.21 ( 0.93,1.56 )   | 0.154 | 1.36 ( 0.81,2.30 ) | 0.246 | 0.307       | De novo MR; 2023    |
|                             | Meta-analysis | 81325 | 1640861  |       |           |          |       | 1.07 ( 0.92,1.23 ) | 0.398         | NA                   | NA    | NA                 | NA    |             |                     |
| Peripheral vascular disease | UKB           | 3415  | 364171   | NA    | NA        | NA       | NA    | 3.05 ( 1.92,4.85 ) | 2.30E-06      | NA                   | NA    | NA                 | NA    | NA          | Larsson et al; 2020 |
|                             | MVP           | 31307 | 211753   | 84    | NA        | NA       | NA    | 1.12 ( 0.84,1.49 ) | 0.420         | NA                   | NA    | NA                 | NA    | NA          | Hoek et al; 2022    |

|                                 |                    |        |         |    |        |    |        |                       |          |                       |       |                       |          |       |                     |
|---------------------------------|--------------------|--------|---------|----|--------|----|--------|-----------------------|----------|-----------------------|-------|-----------------------|----------|-------|---------------------|
|                                 | van Zuydam et al   | 12086  | 499548  | 90 | NA     | NA | NA     | 1.87<br>( 1.27,2.75 ) | 0.002    | NA                    | NA    | NA                    | NA       | NA    | Hoek et al; 2022    |
|                                 | FinnGen            | 2230   | 349539  | 96 | 0.526  | NA | 0.515  | 0.99<br>( 0.59,1.66 ) | 0.965    | 0.84<br>( 0.37,1.90 ) | 0.669 | 0.56<br>( 0.14,2.27 ) | 0.419    | 0.394 | De novo MR; 2023    |
|                                 | Meta-analysis      | 49038  | 1425011 |    |        |    |        | 1.58<br>( 0.97,2.58 ) | 0.069    | NA                    | NA    | NA                    | NA       | NA    |                     |
| Coronary artery atherosclerosis | GWAS Meta-analysis | 122733 | 424528  | 71 | NA     | NA | <0.001 | 1.13<br>( 0.87,1.48 ) | 0.368    | 1.69<br>( 1.05,2.73 ) | 0.036 | 1.61<br>( 1.28,2.04 ) | 5.88E-05 | 0.054 | Rosoff et al; 2020  |
|                                 | FinnGen            | 47550  | 313400  | 94 | <0.001 | 2  | <0.001 | 1.07<br>( 0.87,1.32 ) | 0.507    | 1.09<br>( 0.86,1.39 ) | 0.457 | 1.14<br>( 0.65,2.00 ) | 0.639    | 0.809 | De novo MR; 2023    |
|                                 | Meta-analysis      | 170283 | 737928  |    |        |    |        | 1.09<br>( 0.93,1.29 ) | 0.290    | 1.29<br>( 0.85,1.96 ) | 0.232 | 1.50<br>( 1.13,1.97 ) | 0.005    |       |                     |
| Stroke                          | GWAS meta-analysis | 76814  | 812384  | 94 | NA     | NA | NA     | 1.27<br>( 1.12,1.45 ) | 2.87E-04 | 1.30<br>( 1.07,1.58 ) | 0.008 | 1.21<br>( 0.97,1.49 ) | 0.085    | NA    | Larsson et al; 2020 |
|                                 | FinnGen            | 25398  | 339920  | 95 | <0.001 | 1  | 0.007  | 1.08<br>( 0.89,1.31 ) | 0.454    | 1.09<br>( 0.83,1.44 ) | 0.526 | 0.92<br>( 0.55,1.56 ) | 0.767    | 0.536 | De novo MR; 2023    |

|                       |                    |        |         |    |        |    |        |                       |       |                       |       |                       |       |       |                    |
|-----------------------|--------------------|--------|---------|----|--------|----|--------|-----------------------|-------|-----------------------|-------|-----------------------|-------|-------|--------------------|
|                       | Meta-analysis      | 102212 | 1152304 |    |        |    |        | 1.19<br>( 1.02,1.39 ) | 0.028 | 1.22<br>( 1.04,1.44 ) | 0.015 | 1.16<br>( 0.95,1.42 ) | 0.136 |       |                    |
| Myocardial infarction | CARDIoGRAMplusC4D  | 43676  | 128199  | 71 | NA     | NA | 0.008  | 1.23<br>( 0.99,1.53 ) | 0.066 | 1.38<br>( 1.00,1.93 ) | 0.058 | 1.23<br>( 0.94,1.60 ) | 0.127 | 0.350 | Rosoff et al; 2020 |
|                       | FinnGen            | 24185  | 313400  | 95 | <0.001 | 1  | <0.001 | 1.11<br>( 0.88,1.41 ) | 0.376 | 1.24<br>( 0.91,1.70 ) | 0.173 | 1.52<br>( 0.81,2.87 ) | 0.194 | 0.296 | De novo MR; 2023   |
|                       | Meta-analysis      | 67861  | 441599  |    |        |    |        | 1.17<br>( 1.00,1.38 ) | 0.050 | 1.30<br>( 1.04,1.64 ) | 0.021 | 1.27<br>( 0.99,1.62 ) | 0.056 |       |                    |
| Atrial fibrillation   | GWAS Meta-analysis | 60620  | 970216  | 42 | 0.068  | 1  | NA     | 1.00<br>( 0.77,1.32 ) | 0.979 | 1.05<br>( 0.75,1.48 ) | 0.790 | 1.08<br>( 0.36,3.26 ) | 0.892 | 0.894 | Jiang et al; 2020  |
|                       | AFGen              | 65446  | 522744  | 94 | NA     | NA | NA     | 1.17<br>( 1.00,1.37 ) | 0.050 | 1.17<br>( 0.93,1.46 ) | 0.186 | 1.24<br>( 0.94,1.62 ) | 0.124 | NA    | Larsson et al;     |
|                       | FinnGen            | 45766  | 191924  | 94 | <0.001 | 2  | <0.001 | 1.10<br>( 0.88,1.38 ) | 0.380 | 1.25<br>( 0.93,1.66 ) | 0.134 | 1.39<br>( 0.77,2.53 ) | 0.276 | 0.411 | De novo MR; 2023   |
|                       | Meta-analysis      | 171832 | 1684884 |    |        |    |        | 1.12<br>( 0.99,1.26 ) | 0.061 | 1.17<br>( 1.00,1.36 ) | 0.057 | 1.26<br>( 0.99,1.60 ) | 0.065 |       |                    |



|                        |               |        |        |    |        |    |        |                    |       |                     |       |                     |           |       |                     |
|------------------------|---------------|--------|--------|----|--------|----|--------|--------------------|-------|---------------------|-------|---------------------|-----------|-------|---------------------|
| Hypertension           | MRC-IEU       | 124227 | 337653 | 71 | NA     | NA | <0.001 | 1.05 ( 1.00,1.10 ) | 0.033 | 1.04 ( 1.01,1.08 )  | 0.017 | 1.14 ( 1.06,1.23 )  | 0.001     | 0.011 | Rosoff et al; 2020  |
|                        | FinnGen       | 111581 | 265626 | 91 | <0.001 | 5  | <0.001 | 1.03 ( 0.86,1.22 ) | 0.780 | 1.25 ( 1.05,1.49 )  | 0.011 | 1.80 ( 1.03,3.14 )  | 0.040     | 0.039 | De novo MR; 2023    |
|                        | Meta-analysis | 235808 | 603279 |    |        |    |        | 1.05 ( 1.00,1.10 ) | 0.043 | 1.12 ( 0.94,1.33 )  | 0.218 | 1.15 ( 1.07,1.24 )  | 2.000E-04 |       |                     |
| Venous thromboembolism | UKB           | 14097  | 353489 | 94 | NA     | 2  | NA     | 1.04 ( 0.77,1.39 ) | 0.810 | 0.90 ( 0.59,1.38 )  | 0.619 | 0.96 ( 0.55,1.68 )  | 0.879     | NA    | Larsson et al; 2020 |
|                        | FinnGen       | 19372  | 357905 | 96 | 0.062  | NA | 0.074  | 1.04 ( 0.85,1.27 ) | 0.693 | 0.92 ( 0.69,1.23 )  | 0.583 | 1.09 ( 0.63,1.86 )  | 0.761     | 0.865 | De novo MR; 2023    |
|                        | Meta-analysis | 33469  | 711394 |    |        |    |        | 1.04 ( 0.88,1.23 ) | 0.643 | 0.91 ( 0.72,1.16 )  | 0.459 | 1.02 ( 0.69,1.51 )  | 0.901     |       |                     |
| Aortic aneurysm        | UKB           | 1374   | 400595 | 68 | NA     | 0  | NA     | 1.96 ( 0.84,4.56 ) | 0.121 | 8.12 ( 1.70,38.86 ) | 0.011 | 6.93 ( 1.87,25.60 ) | 0.001     | NA    | Zhou et al; 2022    |
|                        | FinnGen       | 7395   | 349539 | 96 | 0.022  | NA | 0.020  | 1.06 ( 0.76,1.48 ) | 0.735 | 0.78 ( 0.49,1.24 )  | 0.289 | 0.60 ( 0.24,1.47 )  | 0.266     | 0.183 | De novo MR; 2023    |

|                           |               |       |        |    |        |    |        |                       |       |                       |       |                       |       |       |                  |
|---------------------------|---------------|-------|--------|----|--------|----|--------|-----------------------|-------|-----------------------|-------|-----------------------|-------|-------|------------------|
|                           | Meta-analysis | 8769  | 750134 |    |        |    |        | 1.27<br>( 0.73,2.19 ) | 0.395 | 2.22<br>( 0.23,21.80) | 0.493 | 1.94<br>( 0.18,21.35) | 0.586 |       |                  |
| Varicose veins            | UKB           | 6958  | 330241 | 84 | NA     | 2  | NA     | 1.30<br>( 0.89,1.91 ) | 0.178 | 1.37<br>( 0.82,2.30 ) | 0.235 | 1.83<br>( 0.87,3.87 ) | 0.118 | 0.303 | Yuan et al; 2021 |
|                           | FinnGen       | 29539 | 324121 | 95 | <0.001 | 1  | <0.001 | 1.17<br>( 0.94,1.46 ) | 0.152 | 1.27<br>( 0.98,1.64 ) | 0.066 | 1.11<br>( 0.61,2.01 ) | 0.731 | 0.841 | De novo MR; 2023 |
|                           | Meta-analysis | 36497 | 654362 |    |        |    |        | 1.20<br>( 0.99,1.45 ) | 0.060 | 1.29<br>( 1.02,1.62 ) | 0.031 | 1.35<br>( 0.84,2.18 ) | 0.217 |       |                  |
| Digestive system diseases |               |       |        |    |        |    |        |                       |       |                       |       |                       |       |       |                  |
| Cholangitis               | UKB(lee)      | 477   | 391307 | 80 | NA     | NA | 0.437  | 1.20 (0.33, 4.33)     | 0.779 | 9.52 (1.37, 66.37)    | 0.023 | 5.87 (0.51, 68.21)    | 0.161 | 0.142 | Yuan et al;2023  |
|                           | FinnGen       | 1715  | 330903 | 96 | 0.105  | NA | 0.105  | 0.81<br>( 0.43,1.53 ) | 0.518 | 1.39<br>( 0.56,3.47 ) | 0.478 | 0.32<br>( 0.06,1.77 ) | 0.196 | 0.256 | De novo MR; 2023 |
|                           | Meta-analysis | 2192  | 722210 |    |        |    |        | 0.87<br>( 0.50,1.55 ) | 0.645 | 2.98<br>( 0.47,18.88) | 0.246 | 1.19<br>( 0.07,20.35) | 0.904 |       |                  |
| Cholelithiasis            | UKB(neale)    | 10520 | 350674 | 82 | NA     | NA | NA     | 1.30<br>( 0.82,2.06 ) | 0.267 | 1.00<br>( 0.60,1.65 ) | 0.906 | 1.09<br>( 0.45,2.68 ) | 0.454 | 0.697 | Yuan et al; 2022 |

|               |                    |       |        |    |        |    |        |                    |       |                    |       |                    |       |       |                  |
|---------------|--------------------|-------|--------|----|--------|----|--------|--------------------|-------|--------------------|-------|--------------------|-------|-------|------------------|
|               | FinnGen            | 37041 | 330903 | 89 | <0.001 | 7  | <0.001 | 0.80 ( 0.58,1.11 ) | 0.181 | 0.98 ( 0.76,1.26 ) | 0.868 | 0.53 ( 0.18,1.56 ) | 0.255 | 0.438 | De novo MR; 2023 |
|               | Meta-analysis      | 47561 | 681577 |    |        |    |        | 0.99 ( 0.62,1.59 ) | 0.965 | 0.98 ( 0.78,1.23 ) | 0.889 | 0.81 ( 0.41,1.63 ) | 0.558 |       |                  |
| Cholecystitis | UKB(lee)           | 13777 | 391307 | 80 | NA     | NA | 0.319  | 0.83 (0.48, 1.44)  | 0.502 | 1.71 (0.69, 4.25)  | 0.249 | 1.20 (0.41, 3.52)  | 0.737 | 0.428 | Yuan et al; 2023 |
|               | FinnGen            | 4299  | 330903 | 96 | 0.280  | NA | 0.284  | 1.26 ( 0.85,1.86 ) | 0.242 | 1.04 ( 0.59,1.83 ) | 0.902 | 0.85 ( 0.30,2.40 ) | 0.756 | 0.423 | De novo MR; 2023 |
|               | Meta-analysis      | 18076 | 722210 |    |        |    |        | 1.07 ( 0.72,1.60 ) | 0.736 | 1.20 ( 0.74,1.93 ) | 0.467 | 1.00 ( 0.48,2.12 ) | 0.991 |       |                  |
| NAFLD         | UKB(lee)           | 1664  | 400055 | 80 | NA     | 3  | <0.001 | 1.17 (0.49, 2.80)  | 0.727 | 3.43 (1.19, 9.88)  | 0.022 | 1.44 (0.26, 7.85)  | 0.678 | 0.782 | Yuan et al;2023  |
|               | GWAS Meta-analysis | 8434  | 770180 | 74 | 0.060  | 4  | 0.329  | 0.72 ( 0.41,1.25 ) | 0.241 | 0.98 ( 0.52,1.84 ) | 0.954 | 0.35 ( 0.08,1.62 ) | 0.184 | NA    | Yuan et al; 2022 |
|               | Anstee et al       | 1483  | 17781  | 84 | 0.102  | 3  | 0.719  | 0.41 ( 0.18,0.95 ) | 0.036 | 0.88 ( 0.36,2.16 ) | 0.779 | 0.27 ( 0.02,3.34 ) | 0.308 | NA    | Yuan et al; 2022 |

|                            |                           |               |                 |        |                |    |                |                          |                  |                           |                  |                           |              |       |                     |
|----------------------------|---------------------------|---------------|-----------------|--------|----------------|----|----------------|--------------------------|------------------|---------------------------|------------------|---------------------------|--------------|-------|---------------------|
|                            | FinnGen                   | 22<br>75      | 375<br>002      | 9<br>5 | <0.<br>00<br>1 | 1  | <0.<br>00<br>1 | 0.96<br>( 0.49,1.89<br>) | 0.91<br>3        | 1.36<br>( 0.59,3.13<br>)  | 0.46<br>7        | 0.75<br>( 0.12,4.58<br>)  | 0.75<br>5    | 0.770 | De novo<br>MR; 2023 |
|                            | Meta-<br>analysis         | 13<br>85<br>6 | 156<br>301<br>8 |        |                |    |                | 0.76<br>( 0.54,1.08<br>) | 0.12<br>7        | 1.29<br>( 0.79,2.09<br>)  | 0.31<br>1        | 0.62<br>( 0.26,1.50<br>)  | 0.29<br>2    |       |                     |
| Alcoholic<br>Liver Disease | FinnGen                   | 27<br>61      | 366<br>450      | 9<br>6 | 0.0<br>71      | NA | 0.0<br>63      | 3.67<br>( 2.18,6.19<br>) | 9.78<br>E-<br>07 | 4.77<br>( 2.26,10.0<br>8) | 4.08<br>E-<br>05 | 9.36<br>( 2.11,41.4<br>1) | 4.05<br>E-03 | 0.192 | De novo<br>MR; 2023 |
| Cirrhosis                  | UKB(lee)                  | 28<br>95      | 400<br>055      | 8<br>0 | NA             | NA | 0.0<br>81      | 1.16 (0.06,<br>20.81)    | 0.91<br>9        | 2.90 (0.03,<br>332.48)    | 0.66<br>0        | 1.13 (0.00,<br>314.58)    | 0.96<br>6    | 0.992 | Yuan et al;<br>2023 |
|                            | FinnGen                   | 39<br>70      | 373<br>307      | 9<br>5 | <0.<br>00<br>1 | 1  | <0.<br>00<br>1 | 2.45<br>( 1.50,3.99<br>) | 3.47<br>E-<br>04 | 3.14<br>( 1.67,5.92<br>)  | 3.99<br>E-<br>04 | 2.45<br>( 0.66,9.12<br>)  | 0.18<br>6    | 0.999 | De novo<br>MR; 2023 |
|                            | Meta-<br>analysis         | 68<br>65      | 773<br>362      |        |                |    |                | 2.40<br>( 1.48,3.89<br>) | 4.00<br>E-<br>04 | 3.14<br>( 1.68,5.87<br>)  | 4.00<br>E-<br>04 | 2.45<br>( 0.66,9.11<br>)  | 0.18<br>1    |       |                     |
| GERD                       | UKB(lee)                  | 14<br>22<br>3 | 369<br>275      | 8<br>0 | NA             | NA | 0.0<br>02      | 0.85<br>( 0.63,1.14<br>) | 0.27<br>4        | 0.78<br>( 0.49,1.23<br>)  | 0.28<br>2        | 0.87<br>( 0.49,1.54<br>)  | 0.63<br>0    | 0.925 | Yuan et al;<br>2023 |
|                            | GWAS<br>meta-<br>analysis | 80<br>26<br>5 | 305<br>011      | 7<br>1 | NA             | NA | NA             | 1.00<br>( 0.81,1.23<br>) | 0.98<br>7        | 0.98<br>( 0.78,1.22<br>)  | 0.83<br>9        | 0.92<br>( 0.61,1.37<br>)  | 0.67<br>6    | 0.618 | Yuan et al;<br>2022 |
|                            | FinnGen                   | 26<br>18<br>4 | 320<br>387      | 9<br>6 | 0.0<br>06      | NA | 0.0<br>06      | 1.02<br>( 0.85,1.23<br>) | 0.82<br>3        | 1.12<br>( 0.87,1.45<br>)  | 0.37<br>6        | 1.29<br>( 0.78,2.13<br>)  | 0.31<br>5    | 0.321 | De novo<br>MR; 2023 |

|                 |               |        |        |    |       |    |       |                       |       |                       |       |                       |       |       |                  |
|-----------------|---------------|--------|--------|----|-------|----|-------|-----------------------|-------|-----------------------|-------|-----------------------|-------|-------|------------------|
|                 | Meta-analysis | 120672 | 994673 |    |       |    |       | 1.02<br>( 0.89,1.17 ) | 0.784 | 1.00<br>( 0.86,1.18 ) | 0.961 | 1.01<br>( 0.76,1.33 ) | 0.968 |       |                  |
| Gastric Ulcer   | UKB(lee)      | 4109   | 401525 | 80 | NA    | NA | 0.385 | 1.04<br>( 0.67,1.63 ) | 0.858 | 1.34<br>( 0.62,2.89 ) | 0.456 | 1.11<br>( 0.47,2.65 ) | 0.813 | 0.866 | Yuan et al; 2023 |
|                 | FinnGen       | 5935   | 320387 | 96 | 0.395 | NA | 0.401 | 1.38<br>( 1.00,1.91 ) | 0.053 | 1.93<br>( 1.18,3.16 ) | 0.009 | 1.32<br>( 0.55,3.17 ) | 0.531 | 0.924 | De novo MR; 2023 |
|                 | Meta-analysis | 10044  | 721912 |    |       |    |       | 1.25<br>( 0.96,1.62 ) | 0.097 | 1.73<br>( 1.15,2.63 ) | 0.009 | 1.21<br>( 0.66,2.24 ) | 0.541 |       |                  |
| Duodenal Ulcer  | UKB(lee)      | 3002   | 401525 | 80 | NA    | NA | 0.167 | 1.65<br>( 0.95,2.86 ) | 0.077 | 0.92<br>( 0.39,2.16 ) | 0.843 | 0.96<br>( 0.33,2.82 ) | 0.947 | 0.258 | Yuan et al; 2023 |
|                 | FinnGen       | 3520   | 320387 | 96 | 0.103 | NA | 0.105 | 2.01<br>( 1.28,3.15 ) | 0.002 | 2.44<br>( 1.25,4.75 ) | 0.009 | 2.59<br>( 0.77,8.66 ) | 0.126 | 0.657 | De novo MR; 2023 |
|                 | Meta-analysis | 6522   | 721912 |    |       |    |       | 1.86<br>( 1.31,2.63 ) | 0.001 | 1.56<br>( 0.60,4.04 ) | 0.363 | 1.51<br>( 0.57,3.99 ) | 0.402 |       |                  |
| Acute Gastritis | UKB(lee)      | 1184   | 378124 | 80 | NA    | NA | 0.650 | 1.29<br>( 0.59,2.83 ) | 0.522 | 0.65<br>( 0.16,2.66 ) | 0.553 | 0.90<br>( 0.19,4.30 ) | 0.892 | 0.595 | Yuan et al; 2023 |

|                    |               |      |        |    |       |    |       |                        |       |                        |       |                        |       |       |                  |
|--------------------|---------------|------|--------|----|-------|----|-------|------------------------|-------|------------------------|-------|------------------------|-------|-------|------------------|
|                    | FinnGen       | 2370 | 320387 | 96 | 0.068 | NA | 0.070 | 0.95<br>( 0.54,1.64 )  | 0.843 | 1.10<br>( 0.48,2.50 )  | 0.823 | 1.52<br>( 0.35,6.72 )  | 0.580 | 0.499 | De novo MR; 2023 |
|                    | Meta-analysis | 3554 | 698511 |    |       |    |       | 1.05<br>( 0.67,1.66 )  | 0.826 | 0.96<br>( 0.47,1.96 )  | 0.913 | 1.19<br>( 0.41,3.47 )  | 0.755 |       |                  |
| Chronic Gastritis  | UKB(lee)      | 370  | 378124 | 80 | NA    | NA | 0.425 | 6.03<br>( 1.38,26.24 ) | 0.017 | 1.55<br>( 0.15,15.59 ) | 0.709 | 1.41<br>( 0.08,25.04 ) | 0.816 | 0.253 | Yuan et al; 2023 |
|                    | FinnGen       | 9570 | 320387 | 96 | 0.423 | NA | 0.414 | 1.19<br>( 0.92,1.54 )  | 0.180 | 1.47<br>( 0.99,2.18 )  | 0.056 | 2.57<br>( 1.30,5.06 )  | 0.008 | 0.019 | De novo MR; 2023 |
|                    | Meta-analysis | 9940 | 698511 |    |       |    |       | 2.26<br>( 0.48,10.72 ) | 0.304 | 1.47<br>( 1.00,2.17 )  | 0.051 | 2.49<br>( 1.29,4.82 )  | 0.007 |       |                  |
| Acute Pancreatitis | UKB(lee)      | 1986 | 406271 | 80 | NA    | NA | 0.108 | 0.72<br>( 0.36,1.44 )  | 0.355 | 0.42<br>( 0.14,1.26 )  | 0.122 | 0.76<br>( 0.20,2.88 )  | 0.684 | 0.938 | Yuan et al; 2023 |
|                    | FinnGen       | 6223 | 330903 | 96 | 0.006 | NA | 0.007 | 1.46<br>( 1.01,2.11 )  | 0.043 | 2.01<br>( 1.23,3.29 )  | 0.006 | 3.26<br>( 1.21,8.76 )  | 0.021 | 0.090 | De novo MR; 2023 |
|                    | Meta-analysis | 8209 | 737174 |    |       |    |       | 1.25<br>( 0.90,1.73 )  | 0.180 | 1.00<br>( 0.22,4.58 )  | 0.995 | 1.94<br>( 0.88,4.30 )  | 0.101 |       |                  |

|                      |               |       |        |    |        |    |        |                       |       |                       |       |                         |       |       |                  |
|----------------------|---------------|-------|--------|----|--------|----|--------|-----------------------|-------|-----------------------|-------|-------------------------|-------|-------|------------------|
| Chronic Pancreatitis | UKB(lee)      | 514   | 406271 | 80 | NA     | NA | 0.101  | 2.75<br>( 0.71,10.62) | 0.141 | 3.60<br>( 0.33,38.88) | 0.291 | 16.72<br>( 1.26,221.90) | 0.036 | 0.114 | Yuan et al; 2023 |
|                      | FinnGen       | 3320  | 330903 | 96 | 0.058  | NA | 0.049  | 1.90<br>( 1.18,3.05)  | 0.008 | 2.45<br>( 1.27,4.74)  | 0.008 | 2.05<br>( 0.56,7.45)    | 0.279 | 0.901 | De novo MR; 2023 |
|                      | Meta-analysis | 3834  | 737174 |    |        |    |        | 1.98<br>( 1.26,3.10)  | 0.003 | 2.52<br>( 1.33,4.75)  | 0.004 | 3.12<br>( 0.98,9.93)    | 0.054 |       |                  |
| Acute Appendicitis   | UKB(lee)      | 2608  | 405552 | 80 | NA     | NA | 0.498  | 0.95<br>( 0.55,1.65)  | 0.866 | 0.66<br>( 0.24,1.80)  | 0.421 | 0.57<br>( 0.20,1.64)    | 0.298 | 0.265 | Yuan et al; 2023 |
|                      | FinnGen       | 28745 | 346283 | 96 | 0.132  | NA | 0.150  | 0.97<br>( 0.83,1.14)  | 0.747 | 1.07<br>( 0.84,1.36)  | 0.575 | 0.53<br>( 0.36,0.80)    | 0.003 | 0.002 | De novo MR; 2023 |
|                      | Meta-analysis | 31353 | 751835 |    |        |    |        | 0.97<br>( 0.83,1.13)  | 0.680 | 1.04<br>( 0.82,1.32)  | 0.728 | 0.53<br>( 0.37,0.78)    | 0.001 |       |                  |
| Diverticular Disease | UKB(lee)      | 3195  | 334783 | 80 | NA     | 1  | <0.001 | 1.15<br>( 0.87,1.52)  | 0.333 | 1.09<br>( 0.78,1.51)  | 0.617 | 1.13<br>( 0.66,1.94)    | 0.664 | 0.941 | Yuan et al; 2023 |
|                      | FinnGen       | 30649 | 301931 | 95 | <0.001 | 1  | <0.001 | 0.90<br>( 0.73,1.10)  | 0.308 | 0.95<br>( 0.74,1.21)  | 0.670 | 0.87<br>( 0.50,1.51)    | 0.620 | 0.903 | De novo MR; 2023 |

|                    |                    |       |        |    |       |    |        |                       |       |                       |       |                       |       |       |                      |
|--------------------|--------------------|-------|--------|----|-------|----|--------|-----------------------|-------|-----------------------|-------|-----------------------|-------|-------|----------------------|
|                    | Meta-analysis      | 33844 | 636714 |    |       |    |        | 0.98<br>( 0.83,1.15 ) | 0.818 | 1.00<br>( 0.82,1.22 ) | 0.982 | 0.99<br>( 0.68,1.46 ) | 0.979 |       |                      |
| Crohn's Disease    | UKB(lee)           | 1743  | 334783 | 80 | NA    | NA | 0.394  | 0.98<br>( 0.50,1.93 ) | 0.953 | 0.58<br>( 0.18,1.86 ) | 0.361 | 0.58<br>( 0.16,2.15 ) | 0.420 | 0.304 | Yuan et al; 2023     |
|                    | IIBDGC             | 5956  | 14927  | 82 | NA    | 5  | <0.001 | 0.66<br>( 0.33,1.31 ) | 0.231 | 0.98<br>( 0.54,1.79 ) | 0.948 | 0.82<br>( 0.27,2.46 ) | 0.720 | 0.623 | Yuan et al; 2023     |
|                    | GWAS Meta-analysis | 2194  | 25042  | 90 | NA    | NA | NA     | 1.73<br>( 1.04,2.86 ) | 0.030 | 1.36<br>( 0.56,3.27 ) | 0.500 | 1.03<br>( 0.63,1.70 ) | 0.910 | 0.510 | Georgiou et al; 2021 |
|                    | FinnGen            | 1665  | 375445 | 95 | 0.032 | 1  | 0.027  | 0.94<br>( 0.47,1.90 ) | 0.869 | 1.32<br>( 0.47,3.73 ) | 0.603 | 0.14<br>( 0.01,1.31 ) | 0.088 | 0.082 | De novo MR; 2023     |
|                    | Meta-analysis      | 11558 | 750197 |    |       |    |        | 1.11<br>( 0.81,1.52 ) | 0.502 | 1.04<br>( 0.68,1.57 ) | 0.870 | 0.88<br>( 0.58,1.35 ) | 0.570 |       |                      |
| Ulcerative Colitis | UKB(lee)           | 3195  | 334783 | 80 | NA    | NA | 0.003  | 0.98<br>( 0.53,1.79 ) | 0.937 | 0.97<br>( 0.39,2.40 ) | 0.945 | 0.76<br>( 0.23,2.48 ) | 0.651 | 0.630 | Yuan et al; 2023     |
|                    | IIBDGC             | 5956  | 14927  | 82 | NA    | 3  | <0.001 | 0.99<br>( 0.59,1.66 ) | 0.960 | 0.99<br>( 0.51,1.92 ) | 0.983 | 1.02<br>( 0.43,2.45 ) | 0.961 | 0.922 | Yuan et al; 2023     |



|                                    |                    |       |        |    |       |    |       |                       |       |                         |       |                       |       |       |                      |
|------------------------------------|--------------------|-------|--------|----|-------|----|-------|-----------------------|-------|-------------------------|-------|-----------------------|-------|-------|----------------------|
|                                    | GWAS Meta-analysis | 12366 | 25042  | 90 | NA    | NA | NA    | 1.57<br>( 0.92,2.66 ) | 0.100 | 1.44<br>( 0.57,3.65 )   | 0.440 | 0.97<br>( 0.59,1.61 ) | 0.830 | 0.830 | Georgiou et al; 2021 |
|                                    | FinnGen            | 5034  | 371530 | 95 | 0.001 | 1  | 0.001 | 1.01<br>( 0.65,1.56 ) | 0.960 | 1.13<br>( 0.64,2.00 )   | 0.682 | 0.42<br>( 0.13,1.39 ) | 0.156 | 0.124 | De novo MR; 2023     |
|                                    | Meta-analysis      | 26551 | 746282 |    |       |    |       | 1.11<br>( 0.86,1.43 ) | 0.433 | 1.10<br>( 0.77,1.58 )   | 0.602 | 0.91<br>( 0.68,1.23 ) | 0.543 |       |                      |
| Noninfective enteritis and colitis | FinnGen            | 7988  | 359927 | 96 | 0.295 | NA | 0.289 | 1.12<br>( 0.84,1.48 ) | 0.451 | 1.15<br>( 0.75,1.74 )   | 0.523 | 1.64<br>( 0.76,3.54 ) | 0.207 | 0.289 | De novo MR; 2023     |
| IBS                                | UKB(lee)           | 5548  | 334783 | 80 | NA    | NA | 0.071 | 0.88<br>( 0.57,1.34 ) | 0.538 | 0.96<br>( 0.49,1.90 )   | 0.915 | 0.59<br>( 0.26,1.34 ) | 0.214 | 0.278 | Yuan et al; 2023     |
|                                    | GERA               | 3117  | 53520  | 79 | NA    | NA | 0.346 | 0.50<br>( 0.28,0.90 ) | 0.022 | 0.37<br>( 0.15,0.94 )   | 0.036 | 0.26<br>( 0.05,1.38 ) | 0.118 | 0.413 | Yuan et al; 2023     |
|                                    | FinnGen            | 9323  | 301931 |    | 0.289 | NA | 0.309 | 0.90<br>( 0.69,1.17 ) | 0.415 | 1.09<br>( 0.73,1.61 )   | 0.679 | 1.15<br>( 0.57,2.35 ) | 0.695 | 0.455 | De novo MR; 2023     |
|                                    | Meta-analysis      | 17988 | 690234 |    |       |    |       | 0.83<br>( 0.67,1.02 ) | 0.081 | 0.93<br>( 0.675,1.280 ) | 0.652 | 0.77<br>( 0.46,1.29 ) | 0.320 |       |                      |

|                       |               |       |        |    |       |    |       |                       |       |                       |       |                       |       |       |                        |
|-----------------------|---------------|-------|--------|----|-------|----|-------|-----------------------|-------|-----------------------|-------|-----------------------|-------|-------|------------------------|
| Chronic Periodontitis | GLIDE         | 17353 | 28210  | 33 | 0.034 | NA | 0.467 | 1.41<br>( 1.04,1.90 ) | 0.027 | NA                    | NA    | NA                    | NA    | 0.822 | Baumeister et al; 2021 |
|                       | FinnGen       | 4434  | 259234 | 96 | 0.029 | NA | 0.029 | 1.65<br>( 1.09,2.51 ) | 0.018 | 1.68<br>( 0.92,3.07 ) | 0.093 | 2.24<br>( 0.73,6.87 ) | 0.163 | 0.571 | De novo MR; 2023       |
|                       | Meta-analysis | 21787 | 287444 |    |       |    |       | 1.49<br>( 1.17,1.90 ) | 0.001 | NA                    | NA    | NA                    | NA    |       |                        |

#### Mental and behavioral disorder

|            |                    |       |        |    |        |    |        |                       |       |                        |       |                       |       |       |                   |
|------------|--------------------|-------|--------|----|--------|----|--------|-----------------------|-------|------------------------|-------|-----------------------|-------|-------|-------------------|
| Depression | FinnGen            | 43280 | 329192 | 95 | <0.001 | 1  | <0.001 | 1.16<br>( 0.95,1.40 ) | 0.141 | 1.25<br>( 0.99,1.57 )  | 0.060 | 1.15<br>(0.68,1.94)   | 0.604 | 0.982 | De novo MR; 2023  |
| ADHD       | FinnGen            | 462   | 371117 | 91 | <0.001 | 5  | <0.001 | 1.03<br>( 0.86,1.22 ) | 0.780 | 1.25<br>( 1.05,1.49 )  | 0.011 | 1.80<br>( 1.03,3.14 ) | 0.040 | 0.039 | De novo MR; 2023  |
| Insomnia   | GWAS Meta-analysis | NA    | NA     | 78 | NA     | NA | NA     | 1.13<br>( 0.87,1.45 ) | 0.349 | 1.10<br>( 0.75 , 1.59) | 0.624 | 1.12<br>( 0.74,1.68 ) | 0.579 | NA    | Pasman et al;2020 |
|            | FinnGen            | 4214  | 3514   | 96 | 0.825  | NA | 0.822  | 1.14<br>( 0.78,1.66 ) | 0.500 | 0.91<br>( 0.52,1.60 )  | 0.755 | 1.01<br>( 0.36,2.82 ) | 0.985 | 0.805 | De novo MR; 2023  |
|            | Meta-analysis      | NA    | NA     |    |        |    |        | 1.13<br>( 0.92,1.40 ) | 0.247 | 1.04<br>( 0.76,1.42 )  | 0.818 | 1.10<br>( 0.75,1.62 ) | 0.610 |       |                   |

#### Nervous system diseases

|                     |               |               |            |        |           |    |           |                          |           |                          |           |                          |           |       |                             |
|---------------------|---------------|---------------|------------|--------|-----------|----|-----------|--------------------------|-----------|--------------------------|-----------|--------------------------|-----------|-------|-----------------------------|
| Epilepsy            | ILAE          | 15<br>21<br>2 | 296<br>77  | 6<br>2 | NA        | NA | NA        | 1.22<br>( 1.02,1.45<br>) | 0.02<br>8 | 1.30<br>( 0.99,1.70<br>) | 0.05<br>5 | 1.37<br>( 0.83,2.28<br>) | 0.21<br>9 | NA    | Zhang et al;2022            |
|                     | FinnGen       | 11<br>74<br>0 | 287<br>837 | 9<br>6 | 0.1<br>30 | NA | 0.1<br>28 | 1.15<br>( 0.90,1.47<br>) | 0.26<br>5 | 1.27<br>( 0.90,1.79<br>) | 0.17<br>2 | 1.22<br>( 0.62,2.41<br>) | 0.55<br>8 | 0.847 | De novo MR; 2023            |
|                     | Meta-analysis | 26<br>95<br>2 | 317<br>514 |        |           |    |           | 1.20<br>( 1.04,1.38<br>) | 0.01<br>4 | 1.29<br>( 1.04,1.59<br>) | 0.01<br>9 | 1.31<br>( 0.88,1.97<br>) | 0.18<br>6 |       |                             |
| Alzheimer's Disease | Lambert et al | 17<br>00<br>8 | 371<br>54  | 4<br>1 | 0.0<br>58 | 1  | NA        | 0.96(0.71,1.22)          | 0.77<br>5 | 0.81(0.44,1.18)          | 0.26<br>3 | 0.81(0.38,1.24)          | 0.35<br>3 | 0.286 | Andrews et al;2020          |
|                     | FinnGen       | 64<br>89      | 170<br>429 | 9<br>5 | 0.0<br>06 | 1  | 0.0<br>04 | 0.96<br>( 0.63,1.46<br>) | 0.84<br>7 | 1.23<br>( 0.72,2.12<br>) | 0.44<br>4 | 1.19<br>( 0.39,3.62<br>) | 0.76<br>4 | 0.687 | De novo MR; 2023            |
|                     | Meta-analysis | 23<br>49<br>7 | 207<br>583 |        |           |    |           | 0.96<br>( 0.76,1.21<br>) | 0.72<br>5 | 0.98<br>( 0.65,1.48<br>) | 0.93<br>5 | 0.88<br>( 0.52,1.49<br>) | 0.63<br>6 |       |                             |
| Parkinson's Disease | iPDGC         | 37<br>68<br>8 | 981<br>372 | 3<br>3 | NA        | NA | NA        | 0.79<br>( 0.65,0.96<br>) | 0.02<br>1 | 0.75<br>( 0.60,0.95<br>) | 0.01<br>7 | 0.73<br>( 0.56,0.95<br>) | 0.01<br>9 | NA    | Domínguez-Baleón et al;2021 |
|                     | Courage -PD   | 73<br>69      | 701<br>8   | 6<br>2 | NA        | NA | NA        | 0.68<br>( 0.39,1.18<br>) | 0.17<br>0 | 0.86<br>( 0.42,1.75<br>) | 0.67<br>0 | 0.70<br>( 0.30,1.16<br>) | 0.40<br>0 | 0.940 | Domenighetti et al; 2022    |

|                       |                           |               |                 |             |                |    |           |                          |           |                          |           |                           |           |       |                     |
|-----------------------|---------------------------|---------------|-----------------|-------------|----------------|----|-----------|--------------------------|-----------|--------------------------|-----------|---------------------------|-----------|-------|---------------------|
|                       | FinnGen                   | 42<br>35      | 373<br>042      | 9<br>5      | 0.3<br>43      | NA | 0.3<br>45 | 0.84<br>( 0.57,1.24<br>) | 0.38<br>1 | 0.77<br>( 0.42,1.39<br>) | 0.38<br>7 | 0.86<br>( 0.29,2.53<br>)  | 0.79<br>1 | 0.954 | De novo<br>MR; 2023 |
|                       | Meta-<br>analysis         | 49<br>29<br>2 | 136<br>143<br>2 |             |                |    |           | 0.79<br>( 0.67,0.93<br>) | 0.00<br>5 | 0.76<br>( 0.62,0.93<br>) | 0.00<br>9 | 0.73<br>( 0.58,0.93<br>)  | 0.01<br>1 |       |                     |
| Multiple<br>Sclerosis | IMSGC                     | 47<br>42<br>9 | 683<br>74       | 6<br>7      | NA             | NA | NA        | 0.85<br>( 0.50,1.42<br>) | 0.54<br>0 | 1.12<br>( 0.60,2.13<br>) | 0.71<br>0 | 3.01<br>( 0.62,14.7<br>1) | 0.18<br>0 | 0.100 | Jiang et<br>al;2021 |
|                       | FinnGen                   | 21<br>82      | 373<br>987      | 9<br>6      | <0.<br>00<br>1 | NA | 0.0<br>01 | 0.37<br>( 0.19,0.70<br>) | 0.00<br>2 | 0.46<br>( 0.20,1.07<br>) | 0.07<br>2 | 0.80<br>( 0.14,4.49<br>)  | 0.79<br>6 | 0.345 | De novo<br>MR; 2023 |
|                       | Meta-<br>analysis         | 49<br>61<br>1 | 442<br>361      |             |                |    |           | 0.57<br>( 0.25,1.30<br>) | 0.18<br>2 | 0.75<br>( 0.32,1.79<br>) | 0.51<br>6 | 1.63<br>( 0.45,5.95<br>)  | 0.46<br>0 |       |                     |
| ALS                   | GWAS<br>meta-<br>analysis | 22<br>04<br>0 | 626<br>44       | 1<br>0<br>0 | 0.0<br>23      | NA | 0.0<br>16 | 0.93<br>( 0.67,1.30<br>) | 0.69<br>1 | 0.91<br>( 0.69,1.19<br>) | 0.49<br>0 | 0.93<br>( 0.67,1.30<br>)  | 0.69<br>1 | 0.871 | De novo<br>MR; 2023 |
| Migraine              | UKB                       | 10<br>72      | 360<br>122      | 8<br>2      | NA             | NA | 0.1<br>16 | 0.53<br>( 0.20,1.41<br>) | 0.20<br>4 | 1.94<br>( 0.42,8.88<br>) | 0.39<br>2 | 1.66<br>( 0.25,11.0<br>1) | 0.60<br>0 | 0.171 | Yuan et al;<br>2022 |
|                       | FinnGen                   | 18<br>47<br>7 | 159<br>05       | 9<br>6      | 0.0<br>08      | 1  | 0.0<br>09 | 0.83<br>( 0.67,1.04<br>) | 0.10<br>4 | 0.77<br>( 0.57,1.04<br>) | 0.08<br>3 | 0.61<br>( 0.34,1.11<br>)  | 0.10<br>9 | 0.275 | De novo<br>MR; 2023 |

|                               |               |       |        |    |       |    |        |                       |       |                        |       |                         |       |       |                     |
|-------------------------------|---------------|-------|--------|----|-------|----|--------|-----------------------|-------|------------------------|-------|-------------------------|-------|-------|---------------------|
|                               | Meta-analysis | 19549 | 376027 |    |       |    |        | 0.81<br>( 0.66,1.01 ) | 0.057 | 0.80<br>( 0.59,1.07 )  | 0.132 | 0.67<br>( 0.38,1.17 )   | 0.160 |       |                     |
| Normal-pressure hydrocephalus | FinnGen       | 767   | 375610 | 96 | 0.104 | NA | 0.107  | 1.13<br>( 0.43,2.96 ) | 0.796 | 1.18<br>( 0.29,4.85 )  | 0.815 | 1.01<br>( 0.07,13.80 )  | 0.996 | 0.923 | De novo MR; 2023    |
| Neoplasms                     |               |       |        |    |       |    |        |                       |       |                        |       |                         |       |       |                     |
| Colorectal cancer             | Li et al      | 16871 | 26328  | 84 | NA    | NA | <0.001 | 1.79<br>( 1.23,2.61 ) | 0.003 | 1.49<br>( 0.91,2.43 )  | 0.112 | 2.03<br>( 0.93,4.43 )   | 0.080 | 0.717 | Zhou et al; 2022    |
|                               | UKB(Larsson)  | 5486  | NA     | NA | 0.001 | NA | NA     | 1.31<br>(0.84,2.04)   | 0.235 | 0.89<br>(0.48,1.68)    | 0.729 | 1.10<br>(0.46,2.59)     | 0.833 | 0.638 | Larsson et al; 2020 |
|                               | FinnGen       | 6509  | 287137 | 95 | 0.003 | 1  | 0.003  | 1.01<br>( 0.70,1.47 ) | 0.943 | 1.03<br>( 0.61,1.74 )  | 0.922 | 1.29<br>( 0.47,3.51 )   | 0.622 | 0.614 | De novo MR; 2023    |
|                               | Meta-analysis | 28866 | NA     |    |       |    |        | 1.33<br>( 1.06,1.67 ) | 0.013 | 1.15<br>( 0.84,1.57 )  | 0.372 | 1.47<br>( 0.89,2.44 )   | 0.129 |       |                     |
| Esophageal cancer             | UKB(lee)      | 720   | 393372 | 80 | NA    | NA | 0.274  | 4.10 (1.39, 12.09)    | 0.011 | 8.93 (1.60, 50.01)     | 0.013 | 2.32 (0.29, 18.64)      | 0.431 | 0.532 | Yuan et al; 2023    |
|                               | FinnGen       | 566   | 287137 | 96 | 0.458 | NA | 0.455  | 1.58<br>( 0.57,4.42 ) | 0.379 | 4.33<br>( 0.88,21.16 ) | 0.070 | 7.49<br>( 0.49,115.74 ) | 0.153 | 0.233 | De novo MR; 2023    |

|                          |               |      |        |    |       |    |       |                       |       |                       |       |                       |       |       |                  |
|--------------------------|---------------|------|--------|----|-------|----|-------|-----------------------|-------|-----------------------|-------|-----------------------|-------|-------|------------------|
|                          | Meta-analysis | 1286 | NA     |    |       |    |       | 2.48<br>( 1.18,5.22 ) | 0.017 | 6.04<br>( 1.88,19.43) | 0.003 | 3.57<br>( 0.68,18.69) | 0.132 |       |                  |
| Gastric cancer           | UKB(lee)      | 554  | 393372 | 80 | NA    | NA | 0.682 | 2.08 (0.67, 6.45)     | 0.203 | 2.05 (0.24, 17.37)    | 0.512 | 1.76 (0.18, 17.10)    | 0.626 | 0.867 | Yuan et al; 2023 |
|                          | FinnGen       | 1307 | 287137 | 96 | 0.319 | NA | 0.314 | 1.83<br>( 0.91,3.67 ) | 0.089 | 0.88<br>( 0.30,2.61 ) | 0.815 | 2.44<br>( 0.38,15.77) | 0.352 | 0.746 | De novo MR; 2023 |
|                          | Meta-analysis | 1861 | NA     |    |       |    |       | 1.90<br>( 1.05,3.43 ) | 0.035 | 1.05<br>( 0.40,2.74 ) | 0.929 | 2.14<br>( 0.51,9.05 ) | 0.300 |       |                  |
| Hepatocellular carcinoma | UKB(lee)      | 196  | 393372 | 80 | NA    | NA | 0.372 | 1.76 (0.38, 8.11)     | 0.468 | 1.81 (0.11, 30.86)    | 0.683 | 0.36 (0.02, 6.75)     | 0.495 | 0.218 | Yuan et al; 2023 |
|                          | FinnGen       | 453  | 287137 | 96 | 0.115 | NA | 0.113 | 2.47<br>( 0.72,8.52 ) | 0.151 | 4.93<br>( 0.81,30.16) | 0.088 | 2.01<br>( 0.07,54.65) | 0.680 | 0.849 | De novo MR; 2023 |
|                          | Meta-analysis | 649  | 680509 |    |       |    |       | 2.16<br>( 0.83,5.65 ) | 0.116 | 3.68<br>( 0.80,16.86) | 0.093 | 0.76<br>( 0.08,6.79 ) | 0.805 |       |                  |
| Pancreatic cancer        | UKB(Larsson)  | 1264 | NA     | NA | 0.386 | NA | NA    | 1.16<br>( 0.55,2.43 ) | 0.703 | 0.61<br>( 0.18,2.02 ) | 0.411 | 1.11<br>( 0.27,4.66 ) | 0.884 | 0.951 | Yuan et al; 2023 |
|                          | FinnGen       | 1416 | 287137 | 96 | 0.685 | NA | 0.675 | 0.56<br>( 0.29,1.07 ) | 0.078 | 0.64<br>( 0.24,1.73 ) | 0.381 | 0.84<br>( 0.15,4.76 ) | 0.841 | 0.624 | De novo MR; 2023 |

|                |                    |        |        |    |       |    |        |                       |       |                       |       |                       |       |       |                     |
|----------------|--------------------|--------|--------|----|-------|----|--------|-----------------------|-------|-----------------------|-------|-----------------------|-------|-------|---------------------|
|                | Meta-analysis      | 2680   | NA     |    |       |    |        | 0.77<br>( 0.47,1.26 ) | 0.294 | 0.63<br>( 0.29,1.35 ) | 0.233 | 0.99<br>( 0.33,2.98 ) | 0.988 |       |                     |
| Breast cancer  | BCAC               | 133384 | 113789 | 84 | 0.898 | NA | <0.001 | 1.01<br>( 0.84,1.23 ) | 0.883 | 0.86<br>( 0.71,1.04 ) | 0.128 | 1.01<br>( 0.72,1.41 ) | 0.977 | 0.947 | Zhou et al; 2022    |
|                | GWAS meta-analysis | 122977 | 105974 | NA | 0.000 | 1  | NA     | 0.99<br>( 0.83,1.18 ) | 0.922 | 0.93<br>( 0.76,1.14 ) | 0.498 | 0.95<br>( 0.70,1.28 ) | 0.721 | 0.731 | Larsson et al; 2020 |
|                | UKB                | 13666  | NA     | NA | 0.290 | NA | NA     | 1.10<br>( 0.87,1.40 ) | 0.423 | 1.42<br>( 0.96,2.08 ) | 0.078 | 1.42<br>( 0.89,2.25 ) | 0.138 | 0.213 | Larsson et al; 2020 |
|                | FinnGen            | 15680  | 167189 | 96 | 0.001 | NA | 0.001  | 1.13<br>( 0.87,1.46 ) | 0.365 | 1.02<br>( 0.72,1.45 ) | 0.915 | 0.91<br>( 0.45,1.83 ) | 0.797 | 0.525 | De novo MR; 2023    |
|                | Meta-analysis      | 285707 | NA     |    |       |    |        | 1.04<br>( 0.94,1.15 ) | 0.481 | 0.95<br>( 0.84,1.07 ) | 0.415 | 1.04<br>( 0.85,1.26 ) | 0.714 |       |                     |
| Ovarian cancer | OCAC               | 25509  | 40941  | NA | 0.556 | NA | NA     | 0.91<br>( 0.72,1.15 ) | 0.448 | 0.74<br>( 0.51,1.08 ) | 0.121 | 0.79<br>( 0.53,1.18 ) | 0.251 | 0.385 | Larsson et al; 2020 |
|                | UKB                | 1520   | NA     | NA | 0.309 | NA | NA     | 1.23<br>( 0.62,2.47 ) | 0.554 | 0.54<br>( 0.17,1.69 ) | 0.289 | 0.52<br>( 0.14,1.98 ) | 0.339 | 0.139 | Larsson et al; 2020 |

|                    |               |       |        |    |       |    |       |                       |       |                        |       |                        |       |       |                     |
|--------------------|---------------|-------|--------|----|-------|----|-------|-----------------------|-------|------------------------|-------|------------------------|-------|-------|---------------------|
|                    | FinnGen       | 1025  | 167189 | 95 | 0.007 | 2  | 0.005 | 0.35<br>( 0.14,0.85 ) | 0.021 | 0.24<br>( 0.07,0.81 )  | 0.021 | 0.04<br>( 0.00,0.39 )  | 0.006 | 0.044 | De novo MR; 2023    |
|                    | Meta-analysis | 28054 | NA     |    |       |    |       | 0.89<br>( 0.72,1.10 ) | 0.277 | 0.66<br>( 0.47,0.93 )  | 0.017 | 0.76<br>( 0.52,1.12 )  | 0.166 |       |                     |
| Endometrial cancer | UKB           | 1931  | NA     | NA | 0.208 | NA | NA    | 0.84<br>( 0.45,1.58 ) | 0.591 | 1.24<br>( 0.40,3.79 )  | 0.708 | 2.04<br>( 0.61,6.83 )  | 0.247 | 0.092 | Larsson et al; 2020 |
|                    | FinnGen       | 1967  | 1677   | 96 | 0.042 | NA | 0.043 | 0.85<br>( 0.45,1.58 ) | 0.601 | 1.42<br>( 0.58,3.45 )  | 0.439 | 1.66<br>( 0.31,9.05 )  | 0.558 | 0.402 | De novo MR; 2023    |
|                    | Meta-analysis | 3898  | NA     |    |       |    |       | 0.85<br>( 0.54,1.32 ) | 0.457 | 1.35<br>( 0.67,2.71 )  | 0.403 | 1.90<br>( 0.71,5.08 )  | 0.199 |       |                     |
| Cervical cancer    | UKB           | 1928  | NA     | NA | 0.809 | NA | NA    | 1.33<br>( 0.73,2.42 ) | 0.351 | 1.26<br>( 0.43,3.75 )  | 0.672 | 0.77<br>( 0.24,2.45 )  | 0.658 | 0.280 | Larsson et al; 2020 |
|                    | FinnGen       | 369   | 167189 | 96 | 0.265 | NA | 0.263 | 1.19<br>( 0.32,4.46 ) | 0.796 | 1.89<br>( 0.27,13.37 ) | 0.522 | 0.79<br>( 0.02,28.47 ) | 0.898 | 0.811 | De novo MR; 2023    |
|                    | Meta-analysis | 2297  | NA     |    |       |    |       | 1.30<br>( 0.76,2.25 ) | 0.339 | 1.30<br>( 0.76,2.25 )  | 0.339 | 1.39<br>( 0.54,3.57 )  | 0.499 |       |                     |



|                 |               |        |        |    |        |    |        |                    |          |                    |       |                    |       |       |                     |
|-----------------|---------------|--------|--------|----|--------|----|--------|--------------------|----------|--------------------|-------|--------------------|-------|-------|---------------------|
| Prostate cancer | PRACTICAL     | 79148  | NA     | NA | <0.001 | 7  | NA     | 0.96 ( 0.74,1.24 ) | 0.753    | 1.23 ( 0.95,1.61 ) | 0.118 | 1.15 ( 0.73,1.82 ) | 0.550 | 0.349 | Larsson et al; 2020 |
|                 | UKB           | 7872   | NA     | NA | <0.001 | 1  | NA     | 0.91 ( 0.62,1.34 ) | 0.630    | 1.02 ( 0.57,1.82 ) | 0.956 | 1.01 ( 0.48,2.10 ) | 0.980 | 0.745 | Larsson et al; 2020 |
|                 | FinnGen       | 13216  | 119948 | 94 | <0.001 | 2  | <0.001 | 0.86 ( 0.63,1.17 ) | 0.331    | 1.01 ( 0.68,1.49 ) | 0.964 | 1.30 ( 0.58,2.90 ) | 0.528 | 0.284 | De novo MR; 2023    |
|                 | Meta-analysis | 100236 | NA     |    |        |    |        | 0.92 ( 0.77,1.09 ) | 0.330    | 1.14 ( 0.93,1.40 ) | 0.214 | 1.14 ( 0.81,1.62 ) | 0.454 |       |                     |
| Lung cancer     | ILCCO         | 11348  | NA     | NA | 0.191  | NA | NA     | 1.94 ( 1.41,2.68 ) | 4.68E-05 | 2.04 ( 1.22,3.40 ) | 0.006 | 2.03 ( 1.20,3.44 ) | 0.008 | 0.834 | Larsson et al; 2020 |
|                 | UKB           | 2838   | NA     | NA | 0.079  | NA | NA     | 1.12 ( 0.65,1.93 ) | 0.686    | 0.90 ( 0.36,2.26 ) | 0.828 | 0.75 ( 0.26,2.14 ) | 0.589 | 0.381 | Larsson et al; 2020 |
|                 | Meta-analysis | 14186  | NA     |    |        |    |        | 1.68 ( 1.28,2.22 ) | 2.00E-04 | 1.68 ( 1.07,2.63 ) | 0.023 | 1.66 ( 1.04,2.66 ) | 0.034 |       |                     |
| Bladder cancer  | UKB           | 2883   | 417955 | NA | 0.608  | NA | 0.598  | 0.64 ( 0.38,1.07 ) | 0.090    | 0.51 ( 0.22,1.15 ) | 0.108 | 0.36 ( 0.12,1.04 ) | 0.060 | 0.227 | Xiong et al; 2022   |

|                               |               |      |        |    |       |    |       |                       |          |                       |          |                        |          |       |                     |
|-------------------------------|---------------|------|--------|----|-------|----|-------|-----------------------|----------|-----------------------|----------|------------------------|----------|-------|---------------------|
|                               | FinnGen       | 2053 | 287137 | 96 | 0.030 | NA | 0.029 | 0.96<br>( 0.51,1.78 ) | 0.885    | 1.01<br>( 0.41,2.45 ) | 0.987    | 0.98<br>( 0.19,5.19 )  | 0.983    | 0.972 | De novo MR; 2023    |
|                               | Meta-analysis | 4936 | 705092 |    |       |    |       | 0.75<br>( 0.51,1.12 ) | 0.167    | 0.70<br>( 0.36,1.37 ) | 0.300    | 0.49<br>( 0.20,1.20 )  | 0.117    |       |                     |
| Oral and Oropharyngeal cancer | GAME-OA       | 6034 | 6585   | 60 | NA    | NA | NA    | 9.96<br>( 5.33,18.6 ) | 5.64E-13 | 30.0<br>( 12.6,71.5 ) | 1.47E-14 | 36.7<br>( 14.1,95.5 )  | 6.08E-05 | NA    | Gormley et al; 2020 |
| Kidney cancer                 | UKB           | 1310 | NA     | NA | 0.506 | NA | NA    | 0.90<br>( 0.44,1.86 ) | 0.786    | 0.65<br>( 0.21,2.01 ) | 0.460    | 0.40<br>( 0.10,1.61 )  | 0.200    | 0.181 | Larsson et al; 2020 |
|                               | FinnGen       | 2223 | 287137 | 96 | 0.246 | NA | 0.246 | 0.53<br>( 0.31,0.91 ) | 0.022    | 0.39<br>( 0.17,0.88 ) | 0.024    | 0.39<br>( 0.09,1.67 )  | 0.205    | 0.646 | De novo MR; 2023    |
|                               | Meta-analysis | 3533 | NA     |    |       |    |       | 0.64<br>( 0.42,0.99 ) | 0.043    | 0.47<br>( 0.24,0.90 ) | 0.024    | 0.40<br>( 0.14,1.08 )  | 0.071    |       |                     |
| Brain cancer                  | UKB           | 810  | NA     | NA | 0.120 | NA | NA    | 0.69<br>( 0.26,1.87 ) | 0.467    | 1.91<br>( 0.40,9.14 ) | 0.417    | 1.56<br>( 0.23,10.57 ) | 0.651    | 0.331 | Larsson et al; 2020 |
|                               | FinnGen       | 764  | 287137 | 96 | 0.573 | NA | 0.572 | 1.88<br>( 0.78,4.53 ) | 0.158    | 1.66<br>( 0.43,6.35 ) | 0.461    | 0.50<br>( 0.05,5.26 )  | 0.563    | 0.236 | De novo MR; 2023    |

|                      |               |      |        |    |       |    |       |                       |       |                       |       |                        |       |       |                     |
|----------------------|---------------|------|--------|----|-------|----|-------|-----------------------|-------|-----------------------|-------|------------------------|-------|-------|---------------------|
|                      | Meta-analysis | 1574 | NA     |    |       |    |       | 1.21<br>( 0.63,2.33 ) | 0.576 | 1.76<br>( 0.64,4.89 ) | 0.277 | 0.99<br>( 0.22,4.32 )  | 0.985 |       |                     |
| Head and Neck cancer | UKB           | 1615 | NA     | NA | 0.024 | NA | NA    | 1.75<br>( 0.83,3.72 ) | 0.144 | 2.36<br>( 0.71,7.79 ) | 0.160 | 2.23<br>( 0.51,9.68 )  | 0.283 | 0.706 | Larsson et al; 2020 |
|                      | FinnGen       | 2131 | 287137 | 96 | 0.268 | NA | 0.257 | 1.91<br>( 1.10,3.32 ) | 0.022 | 2.30<br>( 1.01,5.24 ) | 0.048 | 2.72<br>( 0.62,12.05 ) | 0.190 | 0.615 | De novo MR; 2023    |
|                      | Meta-analysis | 3746 | NA     |    |       |    |       | 1.85<br>( 1.19,2.89 ) | 0.007 | 2.32<br>( 1.18,4.57 ) | 0.015 | 2.46<br>( 0.87,7.00 )  | 0.091 |       |                     |
|                      | UKB           | 4869 | NA     | NA | 0.216 | NA | NA    | 0.68<br>( 0.46,1.02 ) | 0.059 | 0.60<br>( 0.32,1.32 ) | 0.232 | 0.54<br>( 0.25,1.16 )  | 0.115 | 0.483 | Larsson et al; 2020 |
| Malignant melanoma   | FinnGen       | 3960 | 286874 | 70 | 0.082 | NA | 0.081 | 1.03<br>( 0.63,1.69 ) | 0.913 | 0.91<br>( 0.44,1.90 ) | 0.810 | 1.72<br>( 0.49,6.02 )  | 0.397 | 0.381 | De novo MR; 2023    |
|                      | Meta-analysis | 8829 | NA     |    |       |    |       | 0.81<br>( 0.54,1.22 ) | 0.320 | 0.73<br>( 0.44,1.22 ) | 0.234 | 0.86<br>( 0.28,2.63 )  | 0.795 |       |                     |
|                      | UKB           | 2296 | NA     | NA | 0.154 | NA | NA    | 0.66<br>( 0.37,1.18 ) | 0.157 | 0.79<br>( 0.30,2.07 ) | 0.626 | 0.88<br>( 0.28,2.69 )  | 0.820 | 0.553 | Larsson et al; 2020 |
| Non-Hodgkin lymphoma | UKB           | 2296 | NA     | NA | 0.154 | NA | NA    | 0.66<br>( 0.37,1.18 ) | 0.157 | 0.79<br>( 0.30,2.07 ) | 0.626 | 0.88<br>( 0.28,2.69 )  | 0.820 | 0.553 | Larsson et al; 2020 |

|                                          |               |       |        |    |       |    |       |                       |       |                        |       |                        |       |       |                     |
|------------------------------------------|---------------|-------|--------|----|-------|----|-------|-----------------------|-------|------------------------|-------|------------------------|-------|-------|---------------------|
|                                          | FinnGen       | 928   | 287137 | 96 | 0.516 | NA | 0.513 | 0.98<br>( 0.44,2.18 ) | 0.957 | 1.14<br>( 0.33,3.97 )  | 0.837 | 1.42<br>( 0.17,11.95 ) | 0.750 | 0.715 | De novo MR; 2023    |
|                                          | Meta-analysis | 3224  | NA     |    |       |    |       | 0.76<br>( 0.47,1.21 ) | 0.244 | 0.91<br>( 0.42,1.94 )  | 0.802 | 0.98<br>( 0.36,2.65 )  | 0.965 |       |                     |
| Leukemia                                 | UKB           | 1403  | NA     | NA | 0.523 | NA | NA    | 0.51<br>( 0.25,1.02 ) | 0.056 | 0.59<br>( 0.15,2.29 )  | 0.447 | 0.68<br>( 0.18,2.59 )  | 0.574 | 0.612 | Larsson et al; 2020 |
|                                          | UKB           | 656   | NA     | NA | 0.216 | NA | NA    | 1.15<br>( 0.41,3.21 ) | 0.795 | 2.38<br>( 0.40,14.37 ) | 0.344 | 1.60<br>( 0.22,11.68 ) | 0.643 | 0.700 | Larsson et al; 2020 |
| Multiple myeloma                         | FinnGen       | 585   | 287129 | 96 | 0.487 | NA | 0.495 | 0.78<br>( 0.29,2.14 ) | 0.632 | 1.40<br>( 0.31,6.32 )  | 0.662 | 1.44<br>( 0.10,21.40 ) | 0.792 | 0.634 | De novo MR; 2023    |
|                                          | Meta-analysis | 1241  | NA     |    |       |    |       | 0.94<br>( 0.46,1.93 ) | 0.870 | 2.02<br>( 0.64,6.39 )  | 0.233 | 1.54<br>( 0.31,7.61 )  | 0.595 |       |                     |
| Other diseases                           |               |       |        |    |       |    |       |                       |       |                        |       |                        |       |       |                     |
| Pregnancy, childbirth and the puerperium |               |       |        |    |       |    |       |                       |       |                        |       |                        |       |       |                     |
| Spontaneous abortion                     | UKB(neale)    | 60565 | 130687 | 84 | 0.342 | NA | NA    | 1.09<br>( 0.93,1.29 ) | 0.300 | 1.04<br>( 0.81,1.34 )  | 0.756 | 0.86<br>( 0.63,1.18 )  | 0.350 | 0.090 | Yuan et al; 2021    |
|                                          | FinnGen       | 16906 | 149622 | 96 | 0.550 | NA | 0.557 | 1.35<br>( 1.11,1.64 ) | 0.003 | 1.29<br>( 0.95,1.75 )  | 0.109 | 1.11<br>( 0.65,1.89 )  | 0.694 | 0.444 | De novo MR; 2023    |

|                   |                    |               |            |        |           |    |           |                       |           |                       |           |                       |           |       |                   |
|-------------------|--------------------|---------------|------------|--------|-----------|----|-----------|-----------------------|-----------|-----------------------|-----------|-----------------------|-----------|-------|-------------------|
|                   | Meta-analysis      | 77<br>47<br>1 | 280<br>309 |        |           |    |           | 1.19<br>( 1.05,1.35 ) | 0.00<br>6 | 1.13<br>( 0.93,1.38 ) | 0.20<br>2 | 0.92<br>( 0.70,1.20 ) | 0.53<br>7 |       |                   |
| Ectopic pregnancy | GWAS Meta-analysis | 35<br>56      | 327<br>733 | 8<br>8 | NA        | NA | NA        | 1.49<br>( 0.52,4.23 ) | 0.46<br>0 | 1.65<br>( 0.39,7.03 ) | 0.50<br>0 | 1.08<br>( 0.03,35.4 ) | 0.97<br>0 | NA    | Rogne et al; 2022 |
|                   | FinnGen            | 56<br>48      | 149<br>622 | 9<br>6 | 0.0<br>09 | NA | 0.0<br>10 | 1.01<br>( 0.69,1.48 ) | 0.96<br>8 | 1.17<br>( 0.70,1.97 ) | 0.54<br>4 | 0.63<br>( 0.22,1.77 ) | 0.37<br>9 | 0.335 | De novo MR; 2023  |
|                   | Meta-analysis      | 92<br>04      | 477<br>355 |        |           |    |           | 1.06<br>( 0.74,1.51 ) | 0.76<br>2 | 1.22<br>( 0.75,1.98 ) | 0.43<br>0 | 0.66<br>( 0.24,1.79 ) | 0.41<br>2 |       |                   |
| Puerperal sepsis  | FinnGen            | 39<br>40      | 202<br>267 | 9<br>6 | 0.9<br>90 | NA | 0.9<br>91 | 1.07<br>( 0.73,1.59 ) | 0.72<br>3 | 1.07<br>( 0.59,1.93 ) | 0.83<br>4 | 0.52<br>( 0.18,1.50 ) | 0.23<br>0 | 0.153 | De novo MR; 2023  |

#### Diseases of the genitourinary system

|                         |               |               |            |        |                |    |                |                       |           |                       |           |                       |           |       |                  |
|-------------------------|---------------|---------------|------------|--------|----------------|----|----------------|-----------------------|-----------|-----------------------|-----------|-----------------------|-----------|-------|------------------|
| Hyperplasia of prostate | UKB           | 14<br>12<br>6 | 169<br>762 | 3<br>8 | 0.4<br>17      | NA | 0.4<br>07      | 0.82<br>( 0.64,1.04 ) | 0.10<br>1 | NA                    | NA        | NA                    | NA        | 0.670 | Wang et al; 2022 |
|                         | FinnGen       | 30<br>06<br>6 | 119<br>297 | 9<br>6 | <0.<br>00<br>1 | NA | <0.<br>00<br>1 | 0.79<br>( 0.63,0.98 ) | 0.03<br>3 | 0.77<br>( 0.59,1.02 ) | 0.06<br>6 | 0.80<br>( 0.45,1.45 ) | 0.47<br>2 | 0.939 | De novo MR; 2023 |
|                         | Meta-analysis | 44<br>19<br>2 | 289<br>059 |        |                |    |                | 0.80<br>( 0.68,0.95 ) | 0.00<br>9 | NA                    | NA        | NA                    | NA        |       |                  |

|                                                              |               |       |        |    |        |    |        |                             |       |                             |       |                             |       |       |                   |
|--------------------------------------------------------------|---------------|-------|--------|----|--------|----|--------|-----------------------------|-------|-----------------------------|-------|-----------------------------|-------|-------|-------------------|
| UTI                                                          | UKB           | 21958 | 464256 | 71 | NA     | NA | NA     | 1.01<br>( 0.80,1.27 )       | 0.926 | 0.95<br>( 0.70,1.29 )       | 0.729 | 1.54<br>( 0.70,3.40 )       | 0.289 | NA    | Zhu et al; 2023   |
| Diseases of the musculoskeletal system and connective tissue |               |       |        |    |        |    |        |                             |       |                             |       |                             |       |       |                   |
| Rheumatoid arthritis                                         | Okada et al;  | 19234 | 61565  | 68 | NA     | NA | NA     | 0.51<br>( 0.30,0.88 )       | 0.020 | 0.88<br>( 0.42,1.85 )       | 0.730 | 2.08<br>( 0.42,10.30 )      | 0.370 | 0.070 | Jiang et al; 2021 |
|                                                              | FinnGen       | 9243  | 368029 | 96 | 0.124  | NA | 0.110  | 0.73<br>( 0.55,0.96 )       | 0.025 | 0.76<br>( 0.50,1.14 )       | 0.185 | 0.41<br>( 0.19,0.88 )       | 0.025 | 0.123 | De novo MR; 2023  |
|                                                              | Meta-analysis | 28477 | 429594 |    |        |    |        | 0.68<br>( 0.53,0.87 )       | 0.002 | 0.79<br>( 0.55,1.13 )       | 0.219 | 0.56<br>( 0.28,1.11 )       | 0.095 |       |                   |
| Low back pain                                                | FinnGen       | 2439  | 460571 | 95 | <0.001 | 1  | <0.001 | 1.04<br>( 0.85,1.28 )       | 0.711 | 1.13<br>( 0.88,1.46 )       | 0.336 | 1.03<br>( 0.59,1.81 )       | 0.915 | 0.976 | De novo MR; 2023  |
|                                                              | MRC-IEU       | 29329 | 270964 | 92 | 0.921  | NA | 0.921  | 1.00<br>( 1.00,1.00 )       | 0.450 | 1.00<br>( 1.00,1.00 )       | 0.732 | 1.00<br>( 0.99,1.01 )       | 0.392 | 0.503 | De novo MR; 2023  |
|                                                              | Meta-analysis | 31768 | 731535 |    |        |    |        | 1.0010<br>( 0.9984,1.0036 ) | 0.448 | 1.0007<br>( 0.9969,1.0045 ) | 0.721 | 1.0040<br>( 0.9950,1.0130 ) | 0.389 |       |                   |
| Osteoporosis                                                 | FinnGen       | 7300  | 358014 | 94 | 0.006  | 2  | 0.006  | 1.21<br>( 0.85,1.72 )       | 0.280 | 1.22<br>( 0.77,1.94 )       | 0.392 | 1.42<br>( 0.53,3.78 )       | 0.487 | 0.739 | De novo MR; 2023  |
| Diseases of the skin and subcutaneous tissue                 |               |       |        |    |        |    |        |                             |       |                             |       |                             |       |       |                   |

|                                    |                    |       |        |    |        |    |        |                       |       |                       |       |                        |       |       |                   |
|------------------------------------|--------------------|-------|--------|----|--------|----|--------|-----------------------|-------|-----------------------|-------|------------------------|-------|-------|-------------------|
| Lupus erythematosus                | GWAS meta-analysis | 5201  | 9066   | 60 | NA     | NA | NA     | 1.24<br>( 0.49,3.15 ) | 0.660 | 0.63<br>( 0.20,2.02 ) | 0.440 | 4.23<br>( 0.31,57.18 ) | 0.280 | 0.320 | Jiang et al; 2021 |
|                                    | FinnGen            | 652   | 353088 | 96 | 0.723  | NA | 0.714  | 1.04<br>( 0.40,2.69 ) | 0.942 | 0.66<br>( 0.16,2.78 ) | 0.574 | 1.74<br>( 0.13,22.79 ) | 0.673 | 0.671 | De novo MR; 2023  |
|                                    | Meta-analysis      | 5853  | 362154 |    |        |    |        | 1.14<br>( 0.58,2.21 ) | 0.704 | 0.64<br>( 0.26,1.58 ) | 0.333 | 2.70<br>( 0.43,16.93 ) | 0.289 |       |                   |
| Psoriasis                          | FinnGen            | 9267  | 364071 | 94 | <0.001 | 2  | <0.001 | 0.99<br>( 0.71,1.40 ) | 0.984 | 1.12<br>( 0.71,1.77 ) | 0.618 | 0.68<br>( 0.22,2.05 )  | 0.491 | 0.472 | De novo MR; 2023  |
| Diseases of the respiratory system |                    |       |        |    |        |    |        |                       |       |                       |       |                        |       |       |                   |
| Asthma                             | FinnGen            | 42163 | 202399 | 94 | <0.001 | 2  | <0.001 | 1.02<br>( 0.85,1.23 ) | 0.796 | 1.08<br>( 0.86,1.36 ) | 0.491 | 0.79<br>( 0.48,1.30 )  | 0.352 | 0.270 | De novo MR; 2023  |
| Pneumonia                          | UKB                | 22567 | 463917 | 71 | NA     | NA | NA     | 0.96<br>( 0.76,1.22 ) | 0.739 | 0.84<br>( 0.62,1.15 ) | 0.277 | 0.75<br>( 0.36,1.69 )  | 0.493 | NA    | Zhu et al; 2023   |
|                                    | FinnGen            | 58174 | 319103 | 96 | 0.007  | NA | 0.006  | 1.06<br>( 0.93,1.21 ) | 0.364 | 0.99<br>( 0.82,1.20 ) | 0.953 | 0.90<br>( 0.63,1.29 )  | 0.569 | 0.331 | De novo MR; 2023  |
|                                    | Meta-analysis      | 80741 | 783020 |    |        |    |        | 1.04<br>( 0.92,1.16 ) | 0.796 | 0.95<br>( 0.80,1.11 ) | 0.504 | 0.87<br>( 0.63,1.21 )  | 0.407 |       |                   |

|                                                   |               |       |         |     |        |    |        |                    |       |                    |       |                    |       |       |                  |
|---------------------------------------------------|---------------|-------|---------|-----|--------|----|--------|--------------------|-------|--------------------|-------|--------------------|-------|-------|------------------|
| COVID-19 (severe)                                 | COVID-19 hg7  | 18152 | 1145549 | 106 | 0.438  | NA | 0.486  | 1.28 ( 1.00,1.64 ) | 0.049 | 1.65 ( 1.13,2.43 ) | 0.010 | 1.70 ( 1.14,2.53 ) | 0.010 | 0.078 | De novo MR; 2023 |
| URIT                                              | UKB           | 2795  | 483689  | 71  | NA     | NA | NA     | 0.94 ( 0.54,1.63 ) | 0.827 | 0.73 ( 0.32,1.65 ) | 0.450 | 0.49 ( 0.07,3.26 ) | 0.461 | NA    | Zhu et al; 2023  |
|                                                   | FinnGen       | 69111 | 308166  | 95  | 0.023  | 1  | 0.129  | 0.98 ( 0.87,1.09 ) | 0.667 | 1.05 ( 0.88,1.25 ) | 0.575 | 1.15 ( 0.85,1.56 ) | 0.377 | 0.262 | De novo MR; 2023 |
|                                                   | Meta-analysis | 71906 | 791855  |     |        |    |        | 0.98 ( 0.88,1.09 ) | 0.698 | 1.03 ( 0.87,1.23 ) | 0.707 | 1.13 ( 0.83,1.52 ) | 0.437 |       |                  |
| Chronic rhinitis, nasopharyngitis and pharyngitis | FinnGen       | 10868 | 283342  | 95  | <0.001 | 1  | <0.001 | 0.99 ( 0.73,1.34 ) | 0.966 | 0.88 ( 0.60,1.31 ) | 0.532 | 0.70 ( 0.31,1.58 ) | 0.390 | 0.364 | De novo MR; 2023 |
| Systemic Inflammatory Response Syndrome           |               |       |         |     |        |    |        |                    |       |                    |       |                    |       |       |                  |
| Sepsis                                            | UKB           | 11643 | 474841  | 71  | NA     | NA | NA     | 0.99 ( 0.75,1.32 ) | 0.967 | 0.95 ( 0.63,1.41 ) | 0.780 | 1.36 ( 0.52,3.55 ) | 0.534 | NA    | Zhu et al; 2023  |
| Diseases of the eye and adnexa                    |               |       |         |     |        |    |        |                    |       |                    |       |                    |       |       |                  |
| Senile cataract                                   | UKB           | 6332  | 354862  | 84  | NA     | NA | NA     | 1.18 ( 0.78,1.79 ) | 0.430 | 1.05 ( 0.55,2.00 ) | 0.892 | 0.76 ( 0.34,1.71 ) | 0.513 | 0.219 | Yuan et al; 2022 |



|                                        |               |               |            |        |                |    |                |                       |           |                       |           |                       |           |       |                     |
|----------------------------------------|---------------|---------------|------------|--------|----------------|----|----------------|-----------------------|-----------|-----------------------|-----------|-----------------------|-----------|-------|---------------------|
|                                        | FinnGen       | 59<br>52<br>2 | 312<br>864 | 9<br>6 | <0.<br>00<br>1 | NA | <0.<br>00<br>1 | 0.95<br>( 0.80,1.12 ) | 0.54<br>0 | 1.01<br>( 0.81,1.25 ) | 0.94<br>4 | 0.78<br>( 0.49,1.24 ) | 0.29<br>4 | 0.375 | De novo<br>MR; 2023 |
|                                        | Meta-analysis | 65<br>85<br>4 | 667<br>726 |        |                |    |                | 0.98<br>( 0.84,1.14 ) | 0.79<br>4 | 1.01<br>( 0.83,1.25 ) | 0.89<br>5 | 0.78<br>( 0.52,1.16 ) | 0.21<br>5 |       |                     |
| Glaucoma                               | FinnGen       | 18<br>90<br>2 | 358<br>375 | 9<br>5 | <0.<br>00<br>1 | 2  | <0.<br>00<br>1 | 1.06<br>( 0.83,1.36 ) | 0.63<br>1 | 1.16<br>( 0.84,1.60 ) | 0.35<br>8 | 0.80<br>( 0.41,1.56 ) | 0.51<br>7 | 0.374 | De novo<br>MR; 2023 |
| Age-related<br>macular<br>degeneration | IAMDGC        | 16<br>14<br>4 | 178<br>32  | NA     | <0.<br>00<br>1 | 3  | NA             | 1.57<br>( 1.03,2.40 ) | 0.04<br>0 | 2.04<br>( 1.23,3.39 ) | 0.00<br>6 | 2.01<br>( 0.98,4.10 ) | 0.06<br>0 | 0.400 | Kuan et al;<br>2021 |
|                                        | FinnGen       | 89<br>13      | 348<br>936 | 9<br>5 | 0.0<br>16      | 1  | 0.0<br>12      | 0.94<br>( 0.68,1.30 ) | 0.71<br>9 | 0.93<br>( 0.60,1.42 ) | 0.92<br>5 | 0.77<br>( 0.33,1.82 ) | 0.56<br>0 | 0.628 | De novo<br>MR; 2023 |
|                                        | Meta-analysis | 25<br>05<br>7 | 366<br>768 |        |                |    |                | 1.19<br>( 0.72,1.97 ) | 0.49<br>2 | 1.36<br>( 0.63,2.94 ) | 0.43<br>2 | 1.28<br>( 0.50,3.28 ) | 0.60<br>5 |       |                     |
| Diabetic<br>retinopathy                | FinnGen       | 10<br>41<br>3 | 308<br>633 | 9<br>4 | <0.<br>00<br>1 | 2  | <0.<br>00<br>1 | 0.99<br>( 0.72,1.36 ) | 0.94<br>5 | 1.19<br>( 0.79,1.79 ) | 0.40<br>0 | 2.85<br>( 1.02,7.93 ) | 0.04<br>8 | 0.036 | De novo<br>MR; 2023 |

ADHD: Attention Deficit Hyperactivity Disorder syndrome; ALS: Amyotrophic lateral sclerosis; NAFLD: Nonalcoholic Fatty Liver Disease; GERD: Gastroesophageal reflux; IBS: irritable bowel syndrome ; URIT: Acute upper respiratory tract infection; ICD-10: International Classification of Diseases, Tenth Revision; NIVs: the number of Single Nucleotide Polymorphisms; P-gt: P-value tests for MR-PRESSO global pleiotropy; IVW: Multiplicative random-effects inverse-variance weighted; P-Q: p-value tests for the heterogeneity of Cochran's Q; OR: Odds ratio; CI: confidence interval; P-intercept: p-value tests for the intercept pleiotropy in MR-

Egger; All statistical tests were two-sided.  $P < 0.05$  was considered significant; ILAE: international league against epilepsy; iPDGC: international parkinson's disease genomics consortium; Courage-PD: Courage parkinson's disease; IMSGC: international multiple sclerosis genetics consortium; IIBDGC: inflammatory bowel disease genetics consortium; GERA: genetic epidemiology research on aging; GLIDE: gene lifestyle interactions in dental endpoints; MRC-IEU: medical research council integrative epidemiology unit; IAMDGC: international age-related macular degeneration genomics consortium; HFMETTC :heart failure molecular epidemiology for therapeutic targets consortium; MVP: million veteran program; CARDIoGRAMplusC4D: coronary artery disease denome-wide replication and meta-analysis plus the coronary artery disease (c4d) genetics; OCAC: ovarian cancer association consortium; PRACTICAL: prostate cancer association group to investigate cancer-associated alterations in the genome; ILCCO: international lung cancer consortium; GAME-OA: Genetic Associations and Mechanisms in Oncology. FinnGen: FinnGen database(<https://www.finnngen.fi/en>); COVID-19 hg7: version 7 data published by the COVID-19 Host Genetics Program(<https://www.covid19hg.org/results/r7/>); UKB: The UK Biobank(<https://www.ukbiobank.ac.uk/>).

Table S7. Mendelian randomization studies included in the meta-analyses of genetic liability to problematic alcohol use in relation to Circulatory system diseases, Digestive system diseases, Nervous system diseases and mental and behavioral disorders, Neoplasms, and Other diseases.

| Diseases                           | Data<br>source<br>s | Cas<br>es | Con<br>trols | NI<br>Vs | MR-<br>PRESSO |              | IVW        |                         | Weight<br>Median |                         | MR-Egger      |                      |               | Author,<br>years |                     |
|------------------------------------|---------------------|-----------|--------------|----------|---------------|--------------|------------|-------------------------|------------------|-------------------------|---------------|----------------------|---------------|------------------|---------------------|
|                                    |                     |           |              |          | P-<br>gt      | Out<br>liers | P-<br>Q    | OR(95%CI)               | P                | OR(95%CI)               | P             | OR(95%CI)            | P             |                  | P<br>interc<br>ept  |
| Diseases of the circulatory system |                     |           |              |          |               |              |            |                         |                  |                         |               |                      |               |                  |                     |
| Heart failure                      | FinnG<br>en         | 273<br>04 | 349<br>973   | 19       | 0.1<br>22     | NA           | 0.1<br>25  | 0.74<br>(0.56,0.9<br>9) | 0.04<br>1        | 0.80<br>(0.57,1.1<br>3) | 0.<br>20<br>6 | 0.83<br>(0.22,3.11)  | 0.<br>78<br>7 | 0.867            | De novo<br>MR; 2023 |
| Peripheral<br>vascular disease     | FinnG<br>en         | 223<br>0  | 349<br>539   | 20       | 0.2<br>60     | NA           | 0.2<br>78  | 1.14<br>(0.51,2.5<br>5) | 0.74<br>1        | 0.92<br>(0.32,2.6<br>5) | 0.<br>87<br>5 | 0.47<br>(0.01,19.68) | 0.<br>69<br>7 | 0.639            | De novo<br>MR; 2023 |
| Coronary artery<br>atherosclerosis | FinnG<br>en         | 475<br>50 | 313<br>400   | 17       | <0.<br>001    | 3            | <0.<br>001 | 0.89<br>(0.61,1.2<br>9) | 0.52<br>5        | 0.99<br>(0.72,1.3<br>7) | 0.<br>96<br>5 | 0.98<br>(0.17,5.67)  | 0.<br>98<br>2 | 0.910            | De novo<br>MR; 2023 |
| Stroke                             | FinnG<br>en         | 253<br>98 | 339<br>920   | 18       | 0.0<br>25     | 1            | 0.0<br>11  | 1.24<br>(0.88,1.7<br>6) | 0.21<br>6        | 1.07<br>(0.74,1.5<br>5) | 0.<br>70<br>3 | 0.59<br>(0.09,3.86)  | 0.<br>58<br>7 | 0.438            | De novo<br>MR; 2023 |
| Myocardial<br>infarction           | FinnG<br>en         | 241<br>85 | 313<br>400   | 18       | 0.0<br>01     | 1            | 0.0<br>01  | 0.86<br>(0.56,1.3<br>2) | 0.49<br>0        | 0.81<br>(0.52,1.2<br>6) | 0.<br>34<br>2 | 2.12<br>(0.31,14.57) | 0.<br>45<br>7 | 0.361            | De novo<br>MR; 2023 |

|                                  |         |        |        |    |        |    |        |                     |       |                     |       |                       |       |       |                  |
|----------------------------------|---------|--------|--------|----|--------|----|--------|---------------------|-------|---------------------|-------|-----------------------|-------|-------|------------------|
| Atrial fibrillation              | FinnGen | 45766  | 191924 | 18 | <0.001 | 2  | <0.001 | 1.13<br>(0.68,1.88) | 0.637 | 1.43<br>(0.98,2.07) | 0.062 | 1.54<br>(0.14,16.87)  | 0.730 | 0.801 | De novo MR; 2023 |
| Hypertension                     | FinnGen | 111581 | 265626 | 16 | <0.001 | 4  | <0.001 | 0.84<br>(0.50,1.40) | 0.502 | 1.16<br>(0.89,1.52) | 0.263 | 1.37<br>(0.12,14.87)  | 0.800 | 0.686 | De novo MR; 2023 |
| Venous thromboembolism           | FinnGen | 19372  | 357905 | 19 | 0.045  | NA | 0.053  | 1.30<br>(0.93,1.83) | 0.123 | 1.13<br>(0.76,1.68) | 0.549 | 0.43<br>(0.10,1.85)   | 0.272 | 0.145 | De novo MR; 2023 |
| Aortic aneurysm                  | FinnGen | 7395   | 349539 | 19 | 0.150  | NA | 0.146  | 1.18<br>(0.71,1.94) | 0.523 | 1.43<br>(0.77,2.68) | 0.259 | 3.03<br>(0.31,29.49)  | 0.353 | 0.416 | De novo MR; 2023 |
| Varicose veins                   | FinnGen | 29539  | 324121 | 19 | 0.001  | 1  | <0.001 | 1.08<br>(0.75,1.58) | 0.673 | 1.11<br>(0.79,1.58) | 0.541 | 1.18<br>(0.20,6.87)   | 0.854 | 0.922 | De novo MR; 2023 |
| Diseases of the digestive system |         |        |        |    |        |    |        |                     |       |                     |       |                       |       |       |                  |
| Cholangitis                      | FinnGen | 1715   | 330903 | 20 | 0.246  | NA | 0.248  | 0.98<br>(0.39,2.46) | 0.960 | 0.85<br>(0.24,2.93) | 0.792 | 4.40<br>(0.06,308.18) | 0.503 | 0.486 | De novo MR; 2023 |
| Cholelithiasis                   | FinnGen | 37041  | 330903 | 15 | <0.001 | 5  | <0.001 | 1.26<br>(0.63,2.54) | 0.515 | 1.24<br>(0.86,1.77) | 0.252 | 8.29<br>(0.16,416.94) | 0.309 | 0.356 | De novo MR; 2023 |
| Cholecystitis                    | FinnGen | 4299   | 330903 | 19 | 0.006  | NA | 0.005  | 1.82<br>(0.82,4.02) | 0.138 | 2.88<br>(1.22,6.77) | 0.015 | 2.94<br>(0.08,114.43) | 0.571 | 0.796 | De novo MR; 2023 |

|                   |       |         |       |        |    |       |    |        |                     |          |                      |       |                       |       |       |                  |
|-------------------|-------|---------|-------|--------|----|-------|----|--------|---------------------|----------|----------------------|-------|-----------------------|-------|-------|------------------|
| NAFLD             |       | FinnGen | 2275  | 375002 | 18 | 0.032 | 1  | 0.025  | 0.93<br>(0.34,2.51) | 0.880    | 1.83<br>(0.61,5.54)  | 0.283 | 0.02<br>(0.00,1.70)   | 0.104 | 0.103 | De novo MR; 2023 |
| Alcoholic Disease | Liver | FinnGen | 2761  | 366450 | 19 | 0.254 | NA | 0.213  | 4.26<br>(1.98,9.19) | 2.14E-04 | 3.80<br>(1.35,10.65) | 0.011 | 3.47<br>(0.10,122.38) | 0.503 | 0.909 | De novo MR; 2023 |
| Cirrhosis         |       | FinnGen | 3970  | 373307 | 19 | 0.011 | NA | 0.007  | 2.76<br>(1.22,6.22) | 0.015    | 2.17<br>(0.91,5.20)  | 0.081 | 3.05<br>(0.07,133.95) | 0.571 | 0.958 | De novo MR; 2023 |
| GERD              |       | FinnGen | 26184 | 320387 | 19 | 0.002 | NA | <0.001 | 1.10<br>(0.77,1.58) | 0.589    | 1.00<br>(0.67,1.47)  | 0.984 | 0.60<br>(0.12,3.02)   | 0.540 | 0.455 | De novo MR; 2023 |
| Gastric Ulcer     |       | FinnGen | 5935  | 320387 | 20 | 0.206 | NA | 0.190  | 1.47<br>(0.87,2.46) | 0.149    | 1.58<br>(0.83,3.00)  | 0.165 | 4.60<br>(0.43,49.32)  | 0.224 | 0.346 | De novo MR; 2023 |
| Duodenal Ulcer    |       | FinnGen | 3520  | 320387 | 19 | 0.125 | NA | 0.103  | 1.58<br>(0.76,3.29) | 0.221    | 1.98<br>(0.85,4.62)  | 0.115 | 0.68<br>(0.02,19.83)  | 0.827 | 0.623 | De novo MR; 2023 |
| Acute Gastritis   |       | FinnGen | 2370  | 320387 | 19 | 0.035 | 1  | 0.030  | 1.53<br>(0.58,4.04) | 0.388    | 1.05<br>(0.34,3.29)  | 0.925 | 1.10<br>(0.01,98.98)  | 0.966 | 0.885 | De novo MR; 2023 |
| Chronic Gastritis |       | FinnGen | 3320  | 330903 | 20 | 0.827 | NA | 0.534  | 1.41<br>(0.98,2.04) | 0.063    | 1.28<br>(0.76,2.17)  | 0.351 | 0.75<br>(0.14,3.96)   | 0.736 | 0.452 | De novo MR; 2023 |

|                                    |         |       |        |    |       |    |       |                     |          |                     |       |                      |       |       |                  |
|------------------------------------|---------|-------|--------|----|-------|----|-------|---------------------|----------|---------------------|-------|----------------------|-------|-------|------------------|
| Acute Pancreatitis                 | FinnGen | 6223  | 330903 | 19 | 0.535 | NA | 0.507 | 2.41<br>(1.52,3.82) | 2.00E-04 | 1.80<br>(0.91,3.56) | 0.092 | 4.29<br>(0.54,4.24)  | 0.187 | 0.583 | De novo MR; 2023 |
| Chronic Pancreatitis               | FinnGen | 3320  | 330903 | 20 | 0.827 | NA | 0.810 | 2.67<br>(1.45,4.91) | 0.002    | 2.51<br>(1.11,5.67) | 0.027 | 1.21<br>(0.07,19.55) | 0.895 | 0.575 | De novo MR; 2023 |
| Acute Appendicitis                 | FinnGen | 28745 | 346283 | 19 | 0.020 | NA | 0.011 | 1.12<br>(0.82,1.52) | 0.470    | 1.22<br>(0.86,1.73) | 0.269 | 0.67<br>(0.17,2.71)  | 0.583 | 0.471 | De novo MR; 2023 |
| Diverticular Disease               | FinnGen | 30649 | 301931 | 20 | 0.036 | 1  | 0.037 | 1.21<br>(0.91,1.61) | 0.195    | 1.07<br>(0.78,1.45) | 0.686 | 0.76<br>(0.20,2.85)  | 0.687 | 0.488 | De novo MR; 2023 |
| Ulcerative Colitis                 | FinnGen | 5034  | 371530 | 19 | 0.029 | NA | 0.037 | 1.17<br>(0.61,2.27) | 0.639    | 1.17<br>(0.52,2.62) | 0.707 | 5.08<br>(0.26,99.04) | 0.298 | 0.334 | De novo MR; 2023 |
| Noninfective enteritis and colitis | FinnGen | 7988  | 359927 | 20 | 0.855 | NA | 0.875 | 1.09<br>(0.73,1.62) | 0.670    | 0.99<br>(0.58,1.70) | 0.971 | 1.53<br>(0.25,9.23)  | 0.648 | 0.708 | De novo MR; 2023 |
| IBS                                | FinnGen | 9323  | 301931 | 20 | 0.040 | 1  | 0.055 | 0.99<br>(0.62,1.57) | 0.963    | 1.03<br>(0.60,1.76) | 0.916 | 0.52<br>(0.06,4.39)  | 0.557 | 0.554 | De novo MR; 2023 |
| Chronic Periodontitis              | FinnGen | 4434  | 259234 | 19 | 0.289 | NA | 0.258 | 1.76<br>(0.97,3.19) | 0.062    | 1.62<br>(0.78,3.35) | 0.194 | 0.87<br>(0.06,13.23) | 0.921 | 0.609 | De novo MR; 2023 |
| Mental and behavioral disorders    |         |       |        |    |       |    |       |                     |          |                     |       |                      |       |       |                  |

|                                |         |       |        |    |        |    |        |                     |       |                     |       |                      |       |       |                  |
|--------------------------------|---------|-------|--------|----|--------|----|--------|---------------------|-------|---------------------|-------|----------------------|-------|-------|------------------|
| Depression                     | FinnGen | 43280 | 329192 | 18 | <0.001 | 2  | <0.001 | 1.30<br>(0.94,1.78) | 0.108 | 1.28<br>(0.91,1.80) | 0.161 | 1.02<br>(0.24,4.30)  | 0.980 | 0.739 | De novo MR; 2023 |
| ADHD                           | FinnGen | 462   | 371117 | 15 | <0.001 | 5  | <0.001 | 0.90<br>(0.54,1.50) | 0.693 | 1.18<br>(0.90,1.53) | 0.225 | 0.96<br>(0.09,10.79) | 0.976 | 0.958 | De novo MR; 2023 |
| Insomnia                       | FinnGen | 4214  | 3514   | 20 | 0.360  | NA | 0.386  | 1.44<br>(0.82,2.52) | 0.199 | 1.42<br>(0.67,3.02) | 0.366 | 1.15<br>(0.08,15.72) | 0.919 | 0.862 | De novo MR; 2023 |
| Diseases of the nervous system |         |       |        |    |        |    |        |                     |       |                     |       |                      |       |       |                  |
| Epilepsy                       | FinnGen | 11740 | 287837 | 19 | 0.010  | 1  | 0.022  | 0.99<br>(0.63,1.54) | 0.950 | 0.92<br>(0.57,1.50) | 0.752 | 0.89<br>(0.11,6.98)  | 0.911 | 0.920 | De novo MR; 2023 |
| Alzheimer's Disease            | FinnGen | 6489  | 170429 | 19 | 0.287  | NA | 0.263  | 1.24<br>(0.71,2.18) | 0.621 | 1.20<br>(0.58,2.50) | 0.621 | 0.12<br>(0.01,1.22)  | 0.091 | 0.059 | De novo MR; 2023 |
| Parkinson's Disease            | FinnGen | 4235  | 373042 | 19 | 0.140  | NA | 0.128  | 1.19<br>(0.62,2.30) | 0.605 | 1.42<br>(0.65,3.12) | 0.382 | 0.88<br>(0.04,18.79) | 0.937 | 0.847 | De novo MR; 2023 |
| Multiple Sclerosis             | FinnGen | 2182  | 373987 | 20 | 0.881  | NA | 0.866  | 0.80<br>(0.38,1.70) | 0.563 | 0.85<br>(0.30,2.41) | 0.763 | 0.15<br>(0.01,4.53)  | 0.291 | 0.338 | De novo MR; 2023 |
| ALS                            | MRC-IEU | 22040 | 62644  | 4  | 0.677  | NA | 0.379  | 0.98<br>(0.93,1.05) | 0.595 | 0.98<br>(0.92,1.04) | 0.497 | 0.98<br>(0.90,1.07)  | 0.719 | 0.937 | De novo MR; 2023 |

|                               |         |        |        |    |        |    |        |                      |       |                      |       |                               |       |       |                  |
|-------------------------------|---------|--------|--------|----|--------|----|--------|----------------------|-------|----------------------|-------|-------------------------------|-------|-------|------------------|
| Migraine                      | FinnGen | 18477  | 15905  | 18 | <0.001 | 3  | <0.001 | 1.02<br>(0.64,1.60)  | 0.948 | 1.05<br>(0.65,1.69)  | 0.850 | 0.61<br>(0.07,5.00)           | 0.649 | 0.631 | De novo MR; 2023 |
| Normal-pressure hydrocephalus | FinnGen | 767    | 375610 | 20 | 0.679  | NA | 0.701  | 0.64<br>(0.18,2.27)  | 0.488 | 0.37<br>(0.06,2.16)  | 0.271 | 0.02<br>(0.00,7.72)           | 0.220 | 0.266 | De novo MR; 2023 |
| Neoplasms                     |         |        |        |    |        |    |        |                      |       |                      |       |                               |       |       |                  |
| Colorectal cancer             | FinnGen | 6509   | 287137 | 20 | 0.133  | NA | 0.140  | 0.98<br>(0.58,1.64)  | 0.938 | 0.82<br>(0.42,1.63)  | 0.579 | 6.93<br>(0.75,64.32)          | 0.106 | 0.095 | De novo MR; 2023 |
| Esophageal cancer             | FinnGen | 566    | 287137 | 19 | 0.314  | NA | 0.312  | 4.57<br>(0.91,22.83) | 0.064 | 7.32<br>(0.85,63.26) | 0.071 | 1163.88<br>( 1.15,1173427.00) | 0.062 | 0.126 | De novo MR; 2023 |
| Gastric cancer                | FinnGen | 1307   | 287137 | 20 | 0.747  | NA | 0.754  | 1.33<br>(0.50,3.50)  | 0.568 | 1.33<br>(0.33,5.47)  | 0.688 | 7.26<br>( 0.09,594.88)        | 0.389 | 0.448 | De novo MR; 2023 |
| Hepatocellular carcinoma      | FinnGen | 453    | 287137 | 19 | 0.402  | NA | 0.447  | 1.85<br>(0.34,10.11) | 0.477 | 4.96<br>(0.42,58.65) | 0.204 | 9.50<br>( 0.00,23643.48)      | 0.580 | 0.670 | De novo MR; 2023 |
| Pancreatic cancer             | FinnGen | 1416   | 287137 | 19 | 0.340  | NA | 0.312  | 0.42<br>(0.15,1.13)  | 0.086 | 0.58<br>(0.16,2.19)  | 0.423 | 0.09<br>(0.00,8.55)           | 0.315 | 0.509 | De novo MR; 2023 |
| Breast cancer                 | BCAC    | 133384 | 113789 | 26 | 0.721  | NA | <0.001 | 1.03<br>(0.82,1.30)  | 0.781 | 0.91<br>(0.79,1.04)  | 0.173 | 0.85<br>(0.61,1.19)           | 0.347 | 0.141 | Zhou et al; 2022 |



|                    |               |        |        |    |        |    |        |                      |       |                      |       |                           |       |       |                  |
|--------------------|---------------|--------|--------|----|--------|----|--------|----------------------|-------|----------------------|-------|---------------------------|-------|-------|------------------|
|                    | FinnGen       | 15680  | 167189 | 18 | <0.001 | 1  | <0.001 | 0.86<br>(0.46,1.59)  | 0.625 | 0.50<br>(0.31,0.83)  | 0.007 | 0.15<br>(0.01,2.54)       | 0.209 | 0.236 | De novo MR; 2023 |
|                    | Meta-analysis | 149064 | 280978 |    |        |    |        | 1.01<br>(0.81,1.25)  | 0.947 | 0.71<br>(0.40,1.26)  | 0.243 | 0.83<br>(0.60,1.16)       | 0.271 |       |                  |
| Ovarian cancer     | FinnGen       | 1025   | 167189 | 19 | 0.126  | NA | 0.131  | 0.60<br>(0.16,2.26)  | 0.450 | 0.75<br>(0.14,3.97)  | 0.737 | 1.26<br>(0.00,619.32)     | 0.942 | 0.812 | De novo MR; 2023 |
| Endometrial cancer | FinnGen       | 1967   | 1677   | 19 | 0.836  | NA | 0.828  | 0.61<br>(0.27,1.40)  | 0.245 | 0.57<br>(0.19,1.75)  | 0.329 | 1.77<br>(0.04,75.38)      | 0.769 | 0.577 | De novo MR; 2023 |
| Cervical cancer    | FinnGen       | 369    | 167189 | 19 | 0.791  | NA | 0.800  | 2.41<br>(0.37,15.67) | 0.357 | 6.13<br>(0.49,76.42) | 0.159 | 39.17<br>(0.01,181963.40) | 0.406 | 0.516 | De novo MR; 2023 |
| Prostate cancer    | FinnGen       | 13216  | 119948 | 20 | 0.035  | NA | 0.033  | 1.07<br>(0.68,1.67)  | 0.778 | 1.21<br>(0.72,2.05)  | 0.472 | 1.03<br>(0.13,8.23)       | 0.980 | 0.972 | De novo MR; 2023 |
| Bladder cancer     | FinnGen       | 2053   | 287137 | 19 | 0.478  | NA | 0.466  | 0.50<br>(0.22,1.12)  | 0.093 | 0.50<br>(0.16,1.55)  | 0.233 | 3.05<br>(0.08,113.06)     | 0.233 | 0.329 | De novo MR; 2023 |
| Kidney cancer      | FinnGen       | 2223   | 287137 | 20 | 0.369  | NA | 0.341  | 1.30<br>(0.59,2.85)  | 0.509 | 1.21<br>(0.40,3.68)  | 0.739 | 6.62<br>(0.19,236.51)     | 0.314 | 0.373 | De novo MR; 2023 |

|                                          |         |           |            |    |           |    |           |                         |           |                          |               |                                 |               |       |                     |
|------------------------------------------|---------|-----------|------------|----|-----------|----|-----------|-------------------------|-----------|--------------------------|---------------|---------------------------------|---------------|-------|---------------------|
| Brain cancer                             | FinnGen | 764       | 287<br>137 | 20 | 0.5<br>85 | NA | 0.5<br>61 | 1.84<br>(0.52,6.5<br>1) | 0.34<br>3 | 3.07<br>(0.49,19.<br>20) | 0.<br>23<br>1 | 2.27<br>( 0.01,693.90<br>)      | 0.<br>78<br>2 | 0.942 | De novo<br>MR; 2023 |
| Head and neck<br>cancer                  | FinnGen | 213<br>1  | 287<br>137 | 20 | 0.6<br>18 | NA | 0.5<br>81 | 2.20<br>(1.03,4.7<br>3) | 0.04<br>2 | 2.43<br>(0.83,7.1<br>1)  | 0.<br>10<br>5 | 0.35<br>(0.01,11.19)            | 0.<br>55<br>9 | 0.299 | De novo<br>MR; 2023 |
| Malignant<br>melanoma                    | FinnGen | 396<br>0  | 286<br>874 | 19 | 0.4<br>40 | NA | 0.4<br>11 | 1.24<br>(0.69,2.2<br>3) | 0.47<br>6 | 0.73<br>(0.32,1.6<br>3)  | 0.<br>44<br>1 | 0.52<br>(0.04,7.76)             | 0.<br>64<br>4 | 0.530 | De novo<br>MR; 2023 |
| Non-Hodgkin<br>lymphoma                  | FinnGen | 928       | 287<br>137 | 20 | 0.5<br>14 | NA | 0.4<br>94 | 1.41<br>(0.45,4.4<br>6) | 0.55<br>5 | 1.43<br>(0.28,7.2<br>7)  | 0.<br>66<br>8 | 48.66<br>(0.26,9105..95<br>)    | 0.<br>16<br>3 | 0.191 | De novo<br>MR; 2023 |
| Multiple myeloma                         | FinnGen | 585       | 287<br>129 | 19 | 0.3<br>09 | NA | 0.3<br>13 | 0.26<br>(0.05,1.2<br>4) | 0.09<br>2 | 0.34<br>(0.04,2.8<br>8)  | 0.<br>32<br>0 | 3370.55<br>( 4.14,2.74E+0<br>6) | 0.<br>03<br>0 | 0.011 | De novo<br>MR; 2023 |
| Other diseases                           |         |           |            |    |           |    |           |                         |           |                          |               |                                 |               |       |                     |
| Pregnancy, childbirth and the puerperium |         |           |            |    |           |    |           |                         |           |                          |               |                                 |               |       |                     |
| Spontaneous<br>abortion                  | FinnGen | 169<br>06 | 149<br>622 | 19 | 0.3<br>97 | NA | 0.3<br>88 | 1.28<br>(0.95,1.7<br>3) | 0.10<br>4 | 1.13<br>(0.73,1.7<br>4)  | 0.<br>58<br>5 | 1.32<br>(0.33,5.35)             | 0.<br>69<br>8 | 0.965 | De novo<br>MR; 2023 |
| Ectopic pregnancy                        | FinnGen | 564<br>8  | 149<br>622 | 20 | 0.1<br>41 | NA | 0.1<br>13 | 0.92<br>(0.53,1.6<br>2) | 0.78<br>1 | 0.72<br>(0.37,1.4<br>2)  | 0.<br>34<br>5 | 2.29<br>(0.17,30.95)            | 0.<br>54<br>0 | 0.492 | De novo<br>MR; 2023 |
| Puerperal sepsis                         | FinnGen | 394<br>0  | 202<br>267 | 19 | 0.4<br>91 | NA | 0.5<br>34 | 0.99<br>(0.55,1.7<br>6) | 0.96<br>6 | 1.35<br>(0.59,3.1<br>2)  | 0.<br>47<br>7 | 0.23<br>(0.02,3.09)             | 0.<br>28<br>0 | 0.272 | De novo<br>MR; 2023 |

|                                                              |               |       |        |    |       |    |       |                     |       |                     |       |                      |       |       |                  |
|--------------------------------------------------------------|---------------|-------|--------|----|-------|----|-------|---------------------|-------|---------------------|-------|----------------------|-------|-------|------------------|
| Diseases of the genitourinary system                         |               |       |        |    |       |    |       |                     |       |                     |       |                      |       |       |                  |
| Hyperplasia of prostate                                      | FinnGen       | 30066 | 119297 | 20 | 0.586 | NA | 0.569 | 0.99<br>(0.77,1.27) | 0.941 | 1.14<br>(0.81,1.59) | 0.463 | 0.67<br>(0.21,2.09)  | 0.493 | 0.493 | De novo MR; 2023 |
| Diseases of the musculoskeletal system and connective tissue |               |       |        |    |       |    |       |                     |       |                     |       |                      |       |       |                  |
| Rheumatoid arthritis                                         | FinnGen       | 9243  | 368029 | 19 | 0.574 | NA | 0.570 | 1.00<br>(0.68,1.46) | 0.999 | 0.87<br>(0.50,1.52) | 0.625 | 0.86<br>(0.15,4.85)  | 0.870 | 0.867 | De novo MR; 2023 |
| Low back pain                                                | MRC-IEU       | 2439  | 460571 | 18 | 0.025 | 1  | 0.014 | 0.93<br>(0.68,1.28) | 0.666 | 1.02<br>(0.72,1.44) | 0.917 | 0.27<br>(0.07,0.99)  | 0.066 | 0.073 | De novo MR; 2023 |
|                                                              | FinnGen       | 29329 | 270964 | 19 | 0.013 | 1  | 0.019 | 0.92<br>(0.68,1.24) | 0.592 | 1.01<br>(0.73,1.41) | 0.932 | 0.29<br>(0.08,1.04)  | 0.075 | 0.087 | De novo MR; 2023 |
|                                                              | Meta-analysis | 31768 | 731535 |    |       |    |       | 0.93<br>(0.75,1.15) | 0.493 | 1.02<br>(0.80,1.29) | 0.893 | 0.28<br>(0.11,0.70)  | 0.006 |       |                  |
| Osteoporosis                                                 | FinnGen       | 7300  | 358014 | 19 | 0.095 | NA | 0.092 | 1.09<br>(0.65,1.84) | 0.742 | 1.11<br>(0.61,2.02) | 0.733 | 1.05<br>(0.09,11.96) | 0.971 | 0.973 | De novo MR; 2023 |
| Diseases of the skin and subcutaneous tissue                 |               |       |        |    |       |    |       |                     |       |                     |       |                      |       |       |                  |
| Lupus erythematosus                                          | FinnGen       | 652   | 353088 | 19 | 0.805 | NA | 0.770 | 0.98<br>(0.24,4.02) | 0.980 | 0.88<br>(0.13,6.08) | 0.897 | 0.13<br>(0.00,72.99) | 0.531 | 0.525 | De novo MR; 2023 |

|                                                   |         |       |         |    |        |    |        |                     |       |                     |       |                      |       |       |                  |
|---------------------------------------------------|---------|-------|---------|----|--------|----|--------|---------------------|-------|---------------------|-------|----------------------|-------|-------|------------------|
| Psoriasis                                         | FinnGen | 9267  | 364071  | 20 | <0.001 | 1  | 0.001  | 1.18<br>(0.68,2.05) | 0.560 | 1.34<br>(0.76,2.35) | 0.309 | 0.47<br>(0.04,5.92)  | 0.564 | 0.473 | De novo MR; 2023 |
| Diseases of the respiratory system                |         |       |         |    |        |    |        |                     |       |                     |       |                      |       |       |                  |
| Asthma                                            | FinnGen | 42163 | 202399  | 16 | <0.001 | 4  | <0.001 | 1.23<br>(0.78,1.95) | 0.374 | 1.60<br>(1.05,2.43) | 0.027 | 0.45<br>(0.06,3.71)  | 0.472 | 0.355 | De novo MR; 2023 |
| Pneumonia                                         | FinnGen | 58174 | 319103  | 19 | 0.122  | NA | 0.109  | 1.23<br>(1.01,1.50) | 0.042 | 1.17<br>(0.91,1.51) | 0.214 | 0.57 ( 0.25 , 1.30)  | 0.198 | 0.079 | De novo MR; 2023 |
| COVID-19 (severe)                                 | HGI 7   | 18152 | 1145549 | 23 | 0.059  | NA | 0.049  | 1.18<br>(0.70,1.99) | 0.525 | 0.91<br>(0.51,1.61) | 0.751 | 0.46<br>(0.07,2.89)  | 0.418 | 0.306 | De novo MR; 2023 |
| URIT                                              | FinnGen | 69111 | 308166  | 18 | 0.001  | 1  | 0.014  | 1.14<br>(0.92,1.42) | 0.238 | 1.06<br>(0.83,1.35) | 0.635 | 0.98<br>(0.36,2.67)  | 0.970 | 0.767 | De novo MR; 2023 |
| Chronic rhinitis, nasopharyngitis and pharyngitis | FinnGen | 10868 | 283342  | 20 | 0.004  | 1  | 0.002  | 0.90<br>(0.54,1.51) | 0.700 | 0.58<br>(0.34,0.96) | 0.036 | 0.13<br>(0.01,1.14)  | 0.082 | 0.089 | De novo MR; 2023 |
| Diseases of the eye and adnexa                    |         |       |         |    |        |    |        |                     |       |                     |       |                      |       |       |                  |
| Senile cataract                                   | FinnGen | 59522 | 312864  | 19 | 0.012  | NA | 0.008  | 0.84<br>(0.64,1.11) | 0.216 | 0.84<br>(0.61,1.16) | 0.298 | 0.16<br>(0.06,0.44)  | 0.002 | 0.004 | De novo MR; 2023 |
| Glaucoma                                          | FinnGen | 18902 | 358375  | 18 | 0.011  | 1  | 0.023  | 0.77<br>(0.53,1.13) | 0.195 | 0.80<br>(0.53,1.23) | 0.309 | 2.45<br>(0.48,12.45) | 0.296 | 0.172 | De novo MR; 2023 |

|                                  |         |       |        |    |        |    |        |                     |       |                     |       |                      |       |       |                  |
|----------------------------------|---------|-------|--------|----|--------|----|--------|---------------------|-------|---------------------|-------|----------------------|-------|-------|------------------|
| Age-related macular degeneration | FinnGen | 8913  | 348936 | 19 | 0.180  | NA | 0.193  | 1.02<br>(0.65,1.62) | 0.925 | 0.87<br>(0.48,1.60) | 0.662 | 0.39<br>(0.05,3.16)  | 0.395 | 0.372 | De novo MR; 2023 |
| Diabetic retinopathy             | FinnGen | 10413 | 308633 | 18 | <0.001 | 3  | <0.001 | 0.89<br>(0.38,2.10) | 0.790 | 1.58<br>(0.79,3.14) | 0.191 | 1.74<br>(0.03,98.60) | 0.791 | 0.743 | De novo MR; 2023 |

ADHD: Attention Deficit Hyperactivity Disorder syndrome; ALS: Amyotrophic lateral sclerosis; NAFLD: Nonalcoholic Fatty Liver Disease; GERD: Gastroesophageal reflux; IBS: irritable bowel syndrome ; URIT: Acute upper respiratory tract infection; ICD-10: International Classification of Diseases, Tenth Revision; NIVs: the number of Single Nucleotide Polymorphisms; P-gt: P-value tests for MR-PRESSO global pleiotropy; IVW: Multiplicative random-effects inverse-variance weighted; P-Q: p-value tests for the heterogeneity of Cochran's Q; OR: Odds ratio; CI: confidence interval; P-intercept: p-value tests for the intercept pleiotropy in MR-Egger; All statistical tests were two-sided. P < 0.05 was considered significant. MRC-IEU: medical research council integrative epidemiology unit; BCAC: the breast cancer association consortium. FinnGen: FinnGen database(<https://www.finnngen.fi/en>); HGI 7: version 7 data published by the COVID-19 Host Genetics Program(<https://www.covid19hg.org/results/r7/>); UKB: The UK Biobank(<https://www.ukbiobank.ac.uk/>).

Table S8. MVMR analysis estimating the effect of alcohol consumption on disease, conditioning on smoking.

| Diseases                | Alcohol consumption |       | Smoking initiation |         |
|-------------------------|---------------------|-------|--------------------|---------|
|                         | OR (95%CI)          | P     | OR (95%CI)         | P       |
| Epilepsy                | 1.12 (0.87,1.43)    | 0.389 | 0.70 (1.03,1.64)   | 0.03    |
| Parkinson's Disease     | 0.76 (0.64,0.91)    | 0.002 | 0.78 (0.54,1.13)   | 0.188   |
| Alcoholic Liver Disease | 1.90 (0.88,4.06)    | 0.099 | 1.91 (1.16,3.15)   | 0.011   |
| Cirrhosis               | 1.25 (0.68,2.32)    | 0.471 | 2.04 (1.34,3.10)   | 0.001   |
| Duodenal Ulcer          | 1.47 (0.92,2.35)    | 0.105 | 1.92 (1.29,2.87)   | 0.001   |
| Chronic Pancreatitis    | 1.98 (1.14,3.44)    | 0.015 | 1.42 (0.94,2.14)   | 0.096   |
| Chronic Periodontitis   | 1.21 (0.88,1.68)    | 0.247 | 1.48 (1.03,2.12)   | 0.034   |
| Spontaneous abortion    | 1.11 (0.96,1.28)    | 0.152 | 1.33 (1.10,1.61)   | 0.004   |
| Hyperplasia of prostate | 0.79 (0.65,0.96)    | 0.018 | 1.16 (0.94,1.43)   | 0.159   |
| Rheumatoid arthritis    | 0.69 (0.49,0.96)    | 0.028 | 1.28 (0.97,1.69)   | 0.079   |
| COVID-19 (severe)       | 1.27 (0.67,2.41)    | 0.457 | 1.27 (1.33,3.08)   | 0.001   |
| Stroke                  | 1.11 (0.81,1.51)    | 0.521 | 1.34 (1.12,1.61)   | 0.001   |
| Hypertension            | 1.05 (1.00,1.10)    | 0.063 | 1.45 (1.22,1.71)   | < 0.001 |
| Colorectal cancer       | 1.45 (1.13,1.85)    | 0.004 | 0.82 (0.60,1.13)   | 0.222   |

|                      |                  |       |                  |       |
|----------------------|------------------|-------|------------------|-------|
| Esophageal cancer    | 1.75 (0.80,3.82) | 0.162 | 1.95 (0.72,5.28) | 0.185 |
| Gastric cancer       | 1.89 (0.90,3.94) | 0.091 | 0.67 (0.35,1.29) | 0.228 |
| Kidney cancer        | 0.83 (0.49,1.40) | 0.489 | 1.64 (1.00,2.70) | 0.052 |
| Head and neck cancer | 1.90 (1.10,3.28) | 0.021 | 1.37 (0.81,2.30) | 0.24  |

OR: Odds ratio; CI: confidence interval; All statistical tests were two-sided.  $P < 0.05$  was considered significant.

Table S9. The effects model was corrected using the B/H correction.

| Diseases                | Alcohol consumption |                       |                  | Problematic alcohol use |                  |                       |
|-------------------------|---------------------|-----------------------|------------------|-------------------------|------------------|-----------------------|
|                         | Univariate MR       |                       | MVMR             |                         | Univariate MR    |                       |
|                         | Original P-value    | B/H corrected P-value | Original P-value | B/H corrected P-value   | Original P-value | B/H corrected P-value |
| Epilepsy                | 0.014               | 0.079                 | 0.389            | 0.493                   | 0.95             | 0.993                 |
| Parkinson's Disease     | 0.005               | 0.044                 | 0.002            | 0.038                   | 0.605            | 0.897                 |
| Alcoholic Liver Disease | 9.78E-07            | 3.86E-05              | 0.099            | 0.181                   | 2.14E-04         | 0.008                 |
| Cirrhosis               | 4.00E-04            | 0.008                 | 0.471            | 0.516                   | 0.015            | 0.274                 |
| Duodenal Ulcer          | 0.001               | 0.013                 | 0.105            | 0.181                   | 0.221            | 0.701                 |
| Acute Pancreatitis      | 0.18                | 0.423                 | NA               | NA                      | 2.00E-04         | 0.008                 |
| Chronic Pancreatitis    | 0.003               | 0.03                  | 0.015            | 0.08                    | 0.002            | 0.049                 |
| Chronic Periodontitis   | 0.001               | 0.013                 | 0.247            | 0.335                   | 0.062            | 0.519                 |
| Spontaneous abortion    | 0.006               | 0.047                 | 0.152            | 0.237                   | 0.104            | 0.563                 |
| Hyperplasia of prostate | 0.009               | 0.059                 | 0.018            | 0.08                    | 0.941            | 0.993                 |
| Rheumatoid arthritis    | 0.002               | 0.023                 | 0.028            | 0.089                   | 0.999            | 0.999                 |
| Pneumonia               | 0.796               | 0.898                 | NA               | NA                      | 0.042            | 0.438                 |
| COVID-19 (severe)       | 0.049               | 0.188                 | 0.457            | 0.516                   | 0.525            | 0.897                 |
| Heart failure           | 0.398               | 0.699                 | NA               | NA                      | 0.041            | 0.438                 |



|                               |          |       |       |       |       |       |
|-------------------------------|----------|-------|-------|-------|-------|-------|
| Stroke                        | 0.028    | 0.138 | 0.521 | 0.521 | 0.216 | 0.701 |
| Hypertension                  | 0.043    | 0.179 | 0.063 | 0.15  | 0.502 | 0.897 |
| Colorectal cancer             | 0.013    | 0.079 | 0.004 | 0.038 | 0.938 | 0.993 |
| Esophageal cancer             | 0.017    | 0.09  | 0.162 | 0.237 | 0.064 | 0.519 |
| Gastric cancer                | 0.035    | 0.163 | 0.091 | 0.181 | 0.568 | 0.897 |
| Lung cancer                   | 2.00E-04 | NA    | NA    | NA    | NA    | NA    |
| Oral and oropharyngeal cancer | 5.64E-13 | NA    | NA    | NA    | NA    | NA    |
| Kidney cancer                 | 0.043    | 0.179 | 0.489 | 0.516 | 0.509 | 0.897 |
| Head and neck cancer          | 0.007    | 0.05  | 0.021 | 0.08  | 0.042 | 0.438 |

MVMR: Genetic predictors of "alcohol consumption" and "smoking initiation" were adjusted for confounding; OR: Odds ratio; CI: confidence interval; All statistical tests were two-sided.  $P < 0.05$  was considered significant.

Table S10. Search Strategies for PubMed, Embase, Web of Science, and Scopus Databases.

|    |                                  |                                                                                                                                                                                                                                                                                                                                                                                                                                                                                                              |
|----|----------------------------------|--------------------------------------------------------------------------------------------------------------------------------------------------------------------------------------------------------------------------------------------------------------------------------------------------------------------------------------------------------------------------------------------------------------------------------------------------------------------------------------------------------------|
| #1 | Alcohol Consumption              | <b>Mesh: Alcohol Drinking</b><br><b>Free terms :</b> “Drinking,Alcohol”,“Alcohol Consumption”,“Consumption, Alcohol”, “Alcohol Intake”,“Intake, Alcohol”,“Alcohol Drinking Habits”,“Alcohol Drinking Habit”,“Drinking Habit, Alcohol”,“Habit, Alcohol Drinking”                                                                                                                                                                                                                                              |
| #2 | Genome-Wide Association Study    | <b>Mesh: “Genome-Wide Association Study”</b><br><b>Free terms :</b> “Association Studies, Genome-Wide”,“Association Study, Genome-Wide”,“Genome-Wide Association Studies”,“Studies, Genome-Wide Association”,“Study, Genome-Wide Association”,“Whole Genome Association Analysis”,“GWA Study”,“GWA Studies”,“Studies, GWA”,“Study, GWA”,“Whole Genome Association Study”,“Genome Wide Association Scan”,“Genome Wide Association Studies”,“Genome Wide Association Analysis”,“Genome Wide Association Study” |
| #3 | Mendelian Randomization Analysis | <b>Mesh: “Mendelian Randomization Analysis”</b><br><b>Free terms: “Analysis, Mendelian Randomization”</b>                                                                                                                                                                                                                                                                                                                                                                                                    |
| #4 | #2 OR #3                         |                                                                                                                                                                                                                                                                                                                                                                                                                                                                                                              |
| #5 | #1 AND #4                        |                                                                                                                                                                                                                                                                                                                                                                                                                                                                                                              |

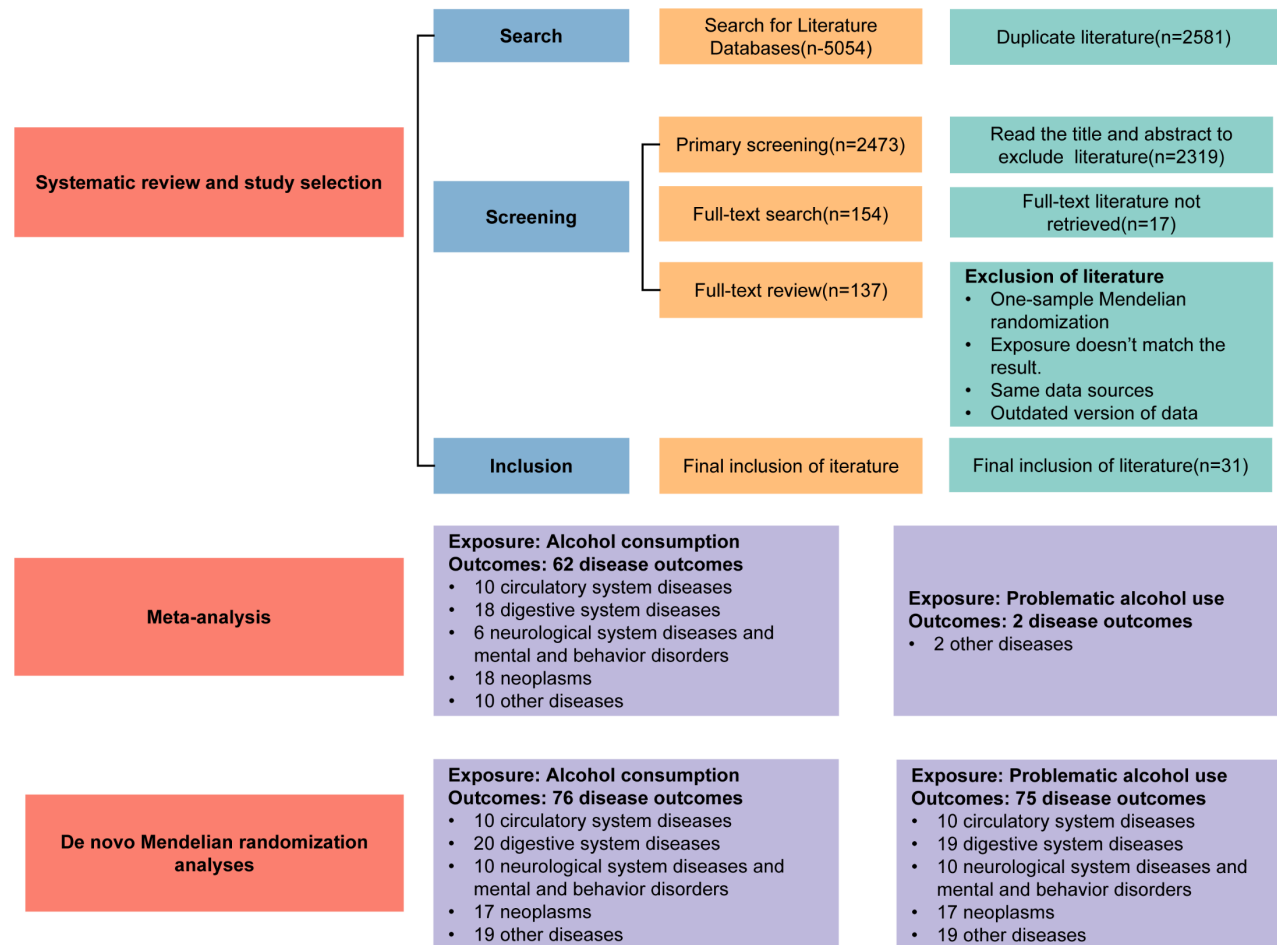

Figure S1. Literature review and study design.

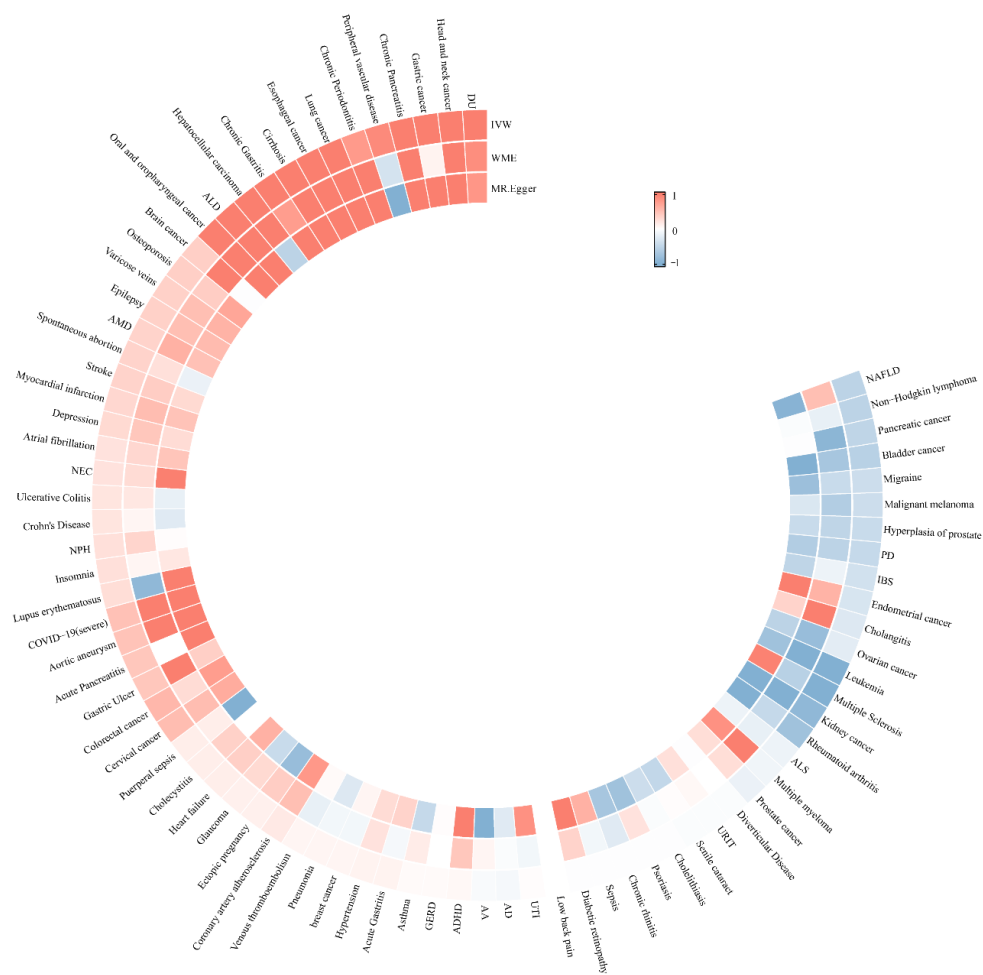

Figure S2. Genetic predictors of "alcohol consumption" and disease risk were summarized by IVW, WME, MR-Egger, and analysis of beta values. beta values >0 were considered risk factors, and beta values <0 were considered protective factors.

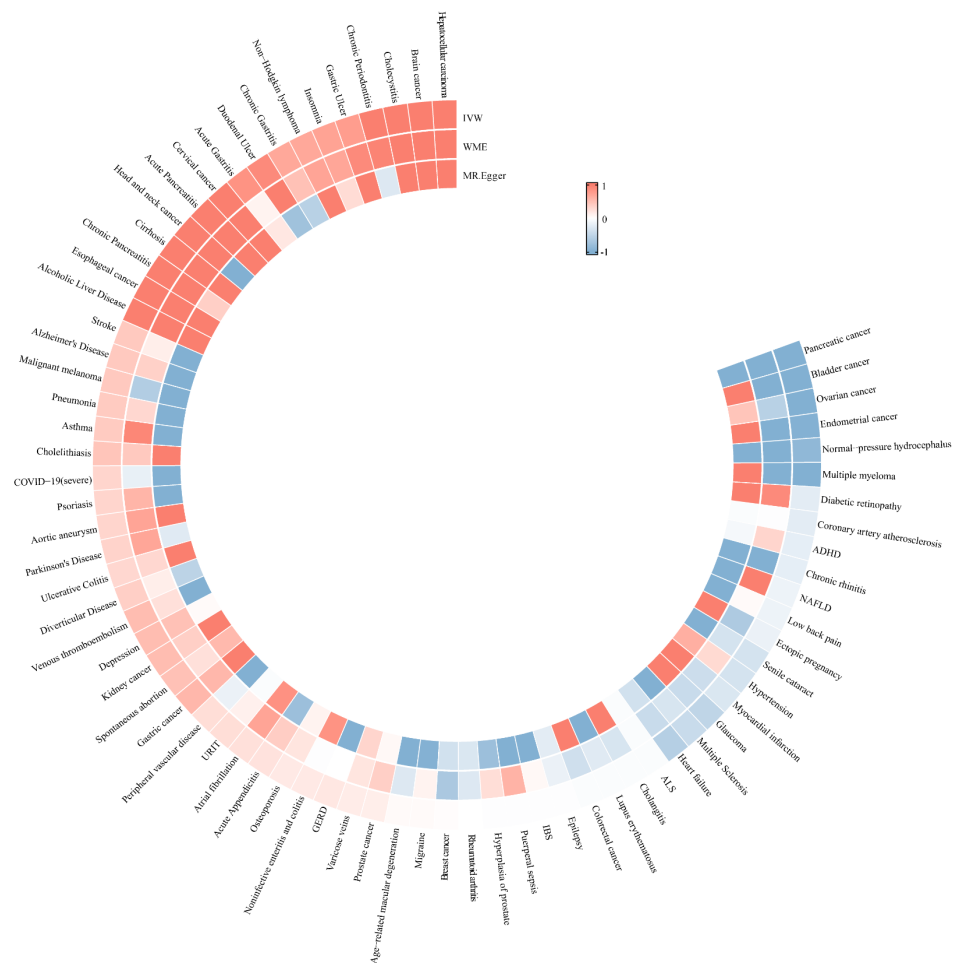

Figure S3. Genetic predictors of "problematic alcohol use" and disease risk were summarized by IVW, WME, MR-Egger, and analysis of beta values. beta values >0 were considered risk factors, and beta values <0 were considered protective factors.

## Reference

1. Saunders, G.R.B.; Wang, X.; Chen, F.; Jang, S.K.; Liu, M.; Wang, C.; Gao, S.; Jiang, Y.; Khunsriraksakul, C.; Otto, J.M., et al. Genetic diversity fuels gene discovery for tobacco and alcohol use. *Nature* 2022, *612*, 720–724, doi:10.1038/s41586-022-05477-4.
2. Zhou, H.; Sealock, J.M.; Sanchez-Roige, S.; Clarke, T.K.; Levey, D.F.; Cheng, Z.; Li, B.; Polimanti, R.; Kember, R.L.; Smith, R.V., et al. Genome-wide meta-analysis of problematic alcohol use in 435,563 individuals yields insights into biology and relationships with other traits. *Nature neuroscience* 2020, *23*, 809–818, doi:10.1038/s41593-020-0643-5.
